# Supplementary material for: The effect of substituents on the aggregation-induced emission of 9,10-phenanthraquinone-hydrazones
Source: Royal Society of Chemistry journal article supplement (doi:10.1039/d3nj02198j), 2023-01-01

*Electronic Supplementary information*

*for*

**Effect of Substituents on the Aggregation-Induced Emission  
of 9,10-Phenanthraquinone-Hydrazones**

Naveen Kumar M,<sup>a</sup> Deikrisha Lyngdoh Lyngkhoi,<sup>b</sup> Sudhakar Gaikwad,<sup>c</sup> Debabrata Samanta,<sup>d</sup>  
Snehadrinarayan Khatua\*<sup>b</sup> and Susnata Pramanik\*<sup>a</sup>

---

<sup>a</sup>*Department of Chemistry, Faculty of Engineering and Technology, SRM Institute of Science and Technology, Kattankulathur, 603203 India. E-mail: susmatap@srmist.edu.in*

<sup>b</sup>*Centre for Advanced Studies, Department of Chemistry, North-Eastern Hill University Shillong, Meghalaya 793022, India. E-mail: snehadri@gmail.com; skhatua@nehu.ac.in*

<sup>c</sup>*Division of Organic Chemistry, CSIR-National Chemical Laboratory, Dr. Homi Bhabha Road, Pashan, 411 008, Pune, Maharashtra, India.*

<sup>d</sup>*Department of Chemistry, Dukhulal Nibaran Chandra College Aurangabad, Suti, West Bengal 742201, India.*

---

**Table of Content**

---

|                                       |     |
|---------------------------------------|-----|
| 1. Synthetic Scheme                   | S2  |
| 2. NMR Characterization               | S3  |
| 3. ESI-HRMS Characterization          | S8  |
| 4. Linear Free Energy Relationship    | S13 |
| 5. Aggregation Studies                | S14 |
| 6. Solid State Emission               | S17 |
| 7. Fluorescence lifetime measurements | S18 |
| 8. X-ray crystallography              | S20 |
| 9. DFT Calculations                   | S23 |

---

## 1. Synthetic Scheme

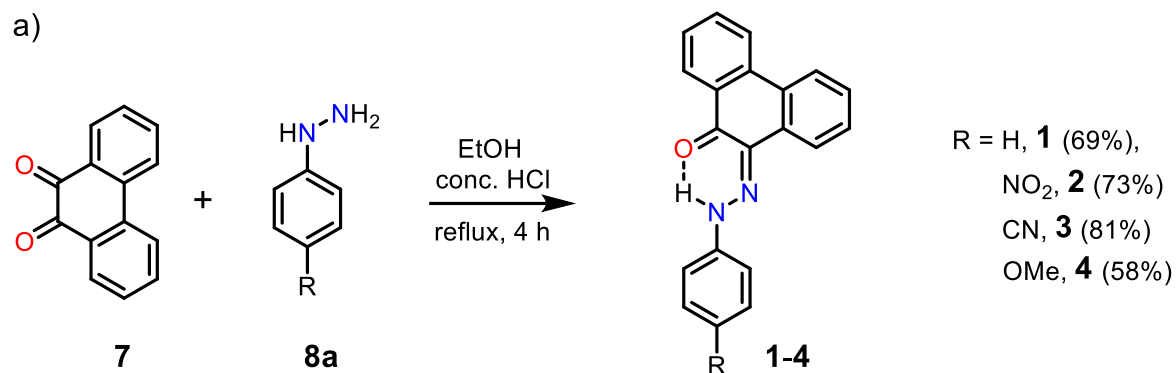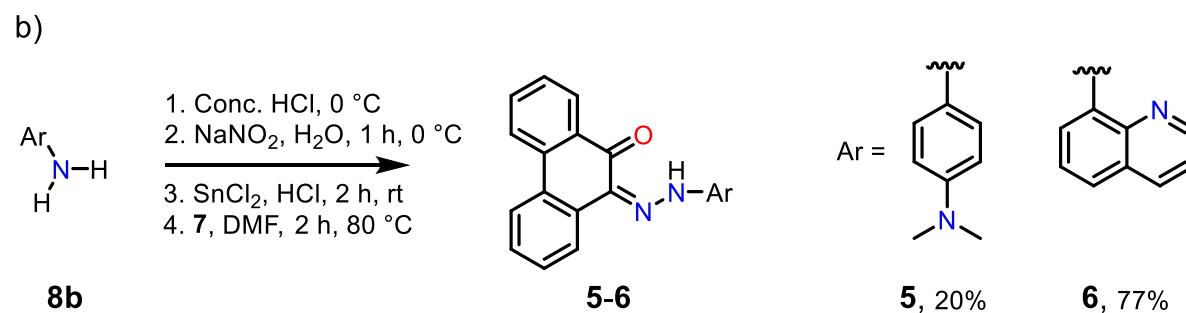

**Scheme 1.** Synthesis of hydrazones **1-6**.

## 2. NMR Characterization

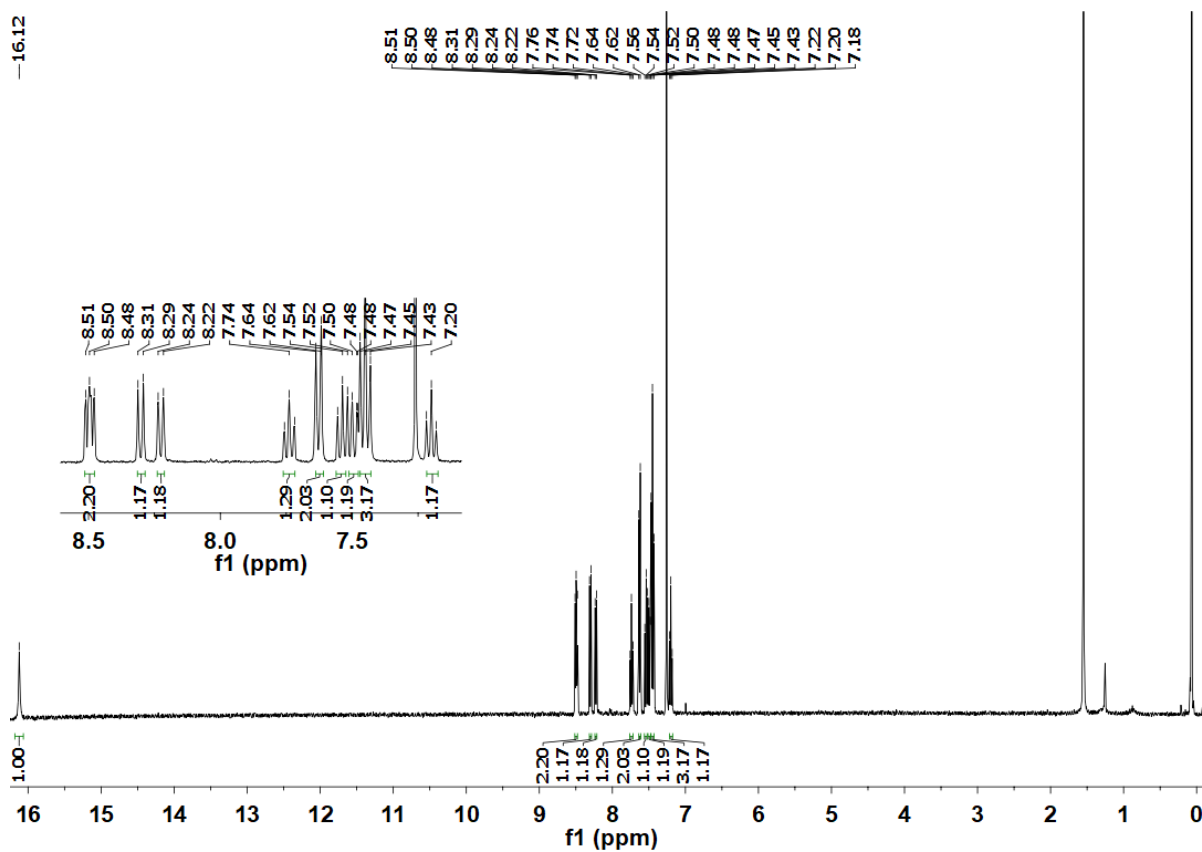

Figure S1.  $^1\text{H}$  NMR (400 MHz,  $\text{CDCl}_3$ , 298 K) spectrum of **1**.

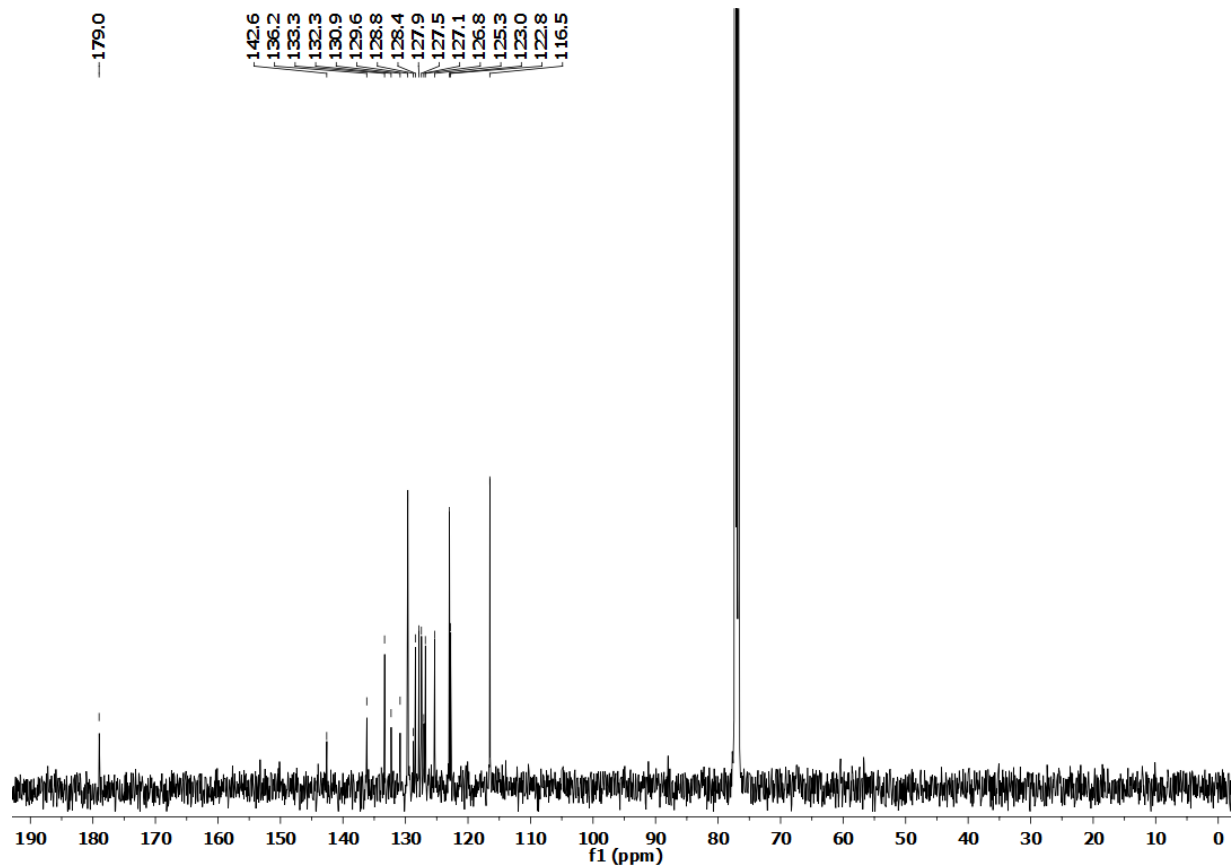

**Figure S2.**  $^{13}\text{C}$  NMR (100 MHz,  $\text{CDCl}_3$ , 298 K) spectrum of **1**.

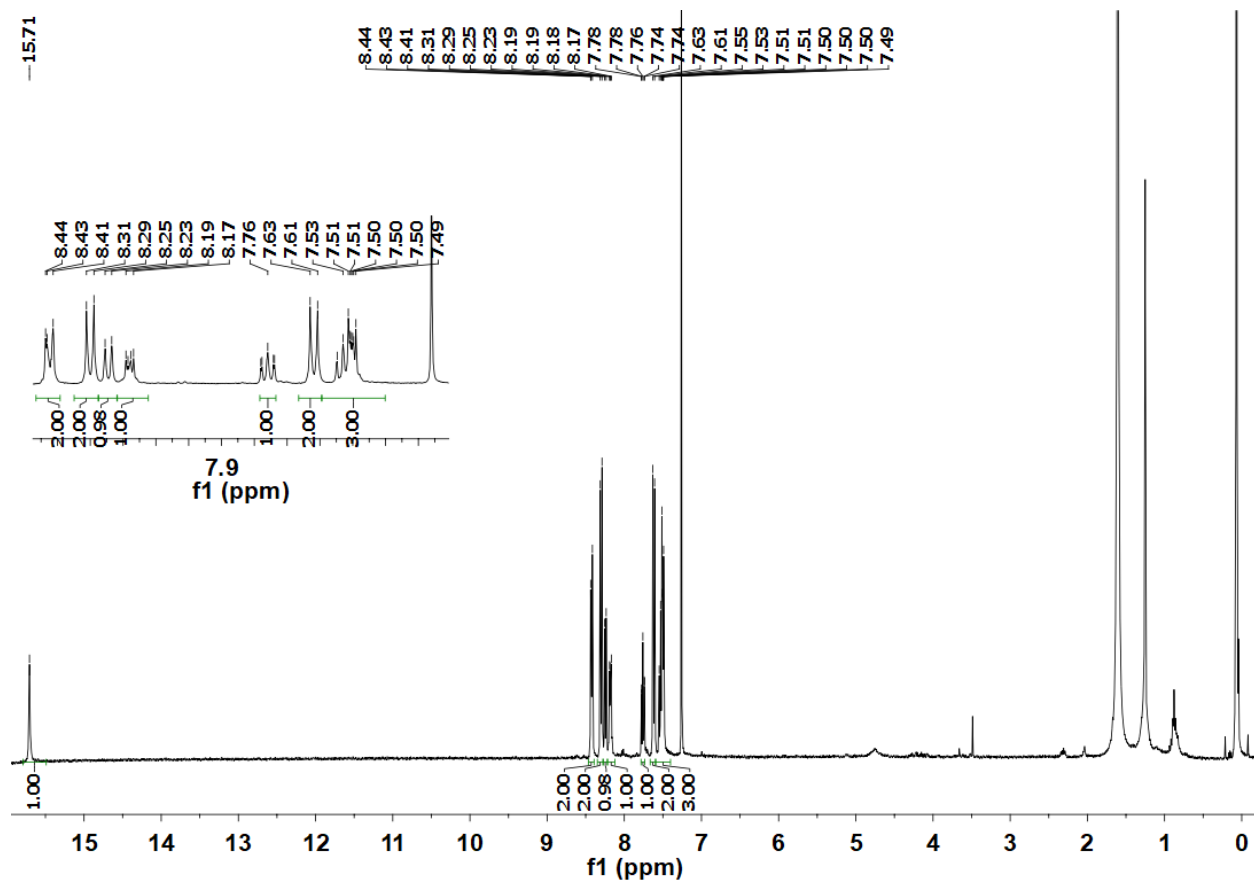

**Figure S3.**  $^1\text{H}$  NMR (400 MHz,  $\text{CDCl}_3$ , 298 K) spectrum of **2**.

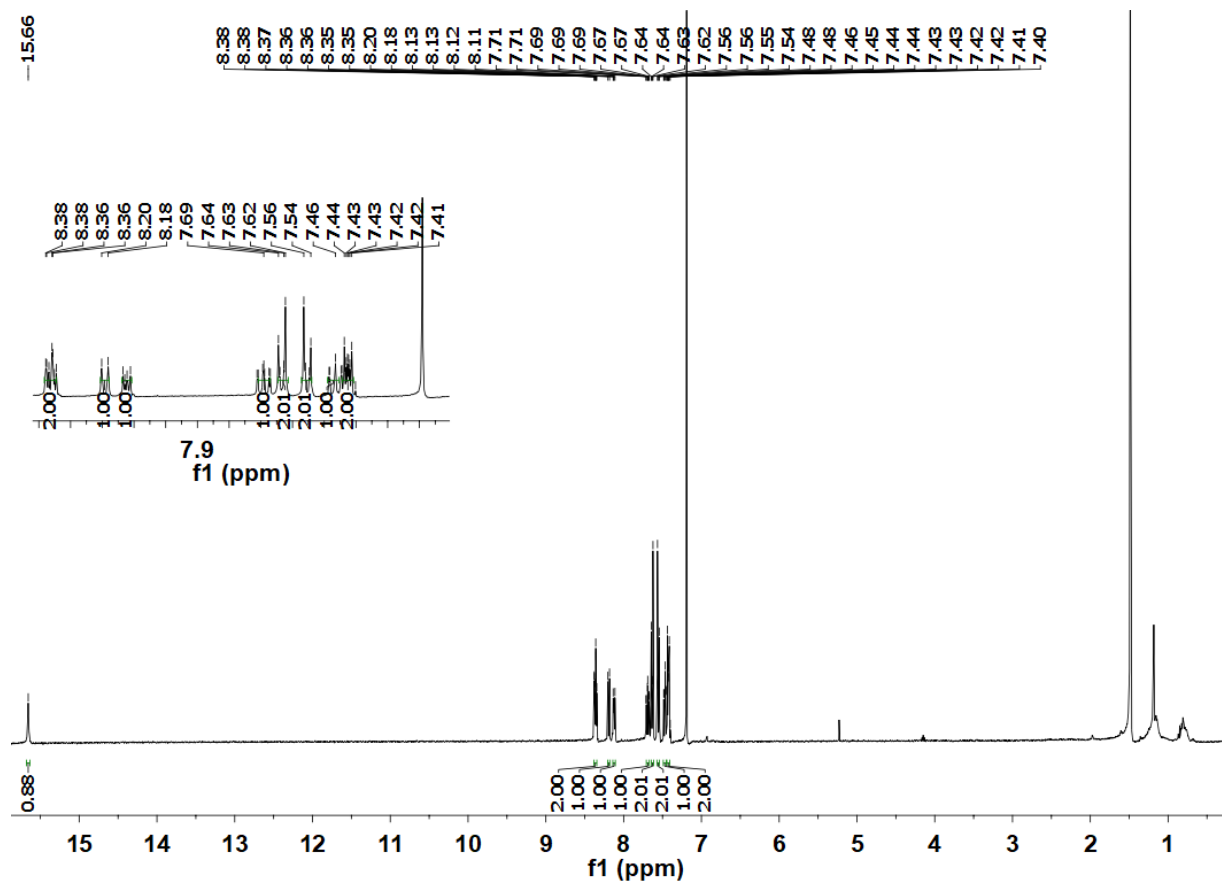

**Figure S4.**  $^1\text{H}$  NMR (400 MHz,  $\text{CDCl}_3$ , 298 K) spectrum of **3**.

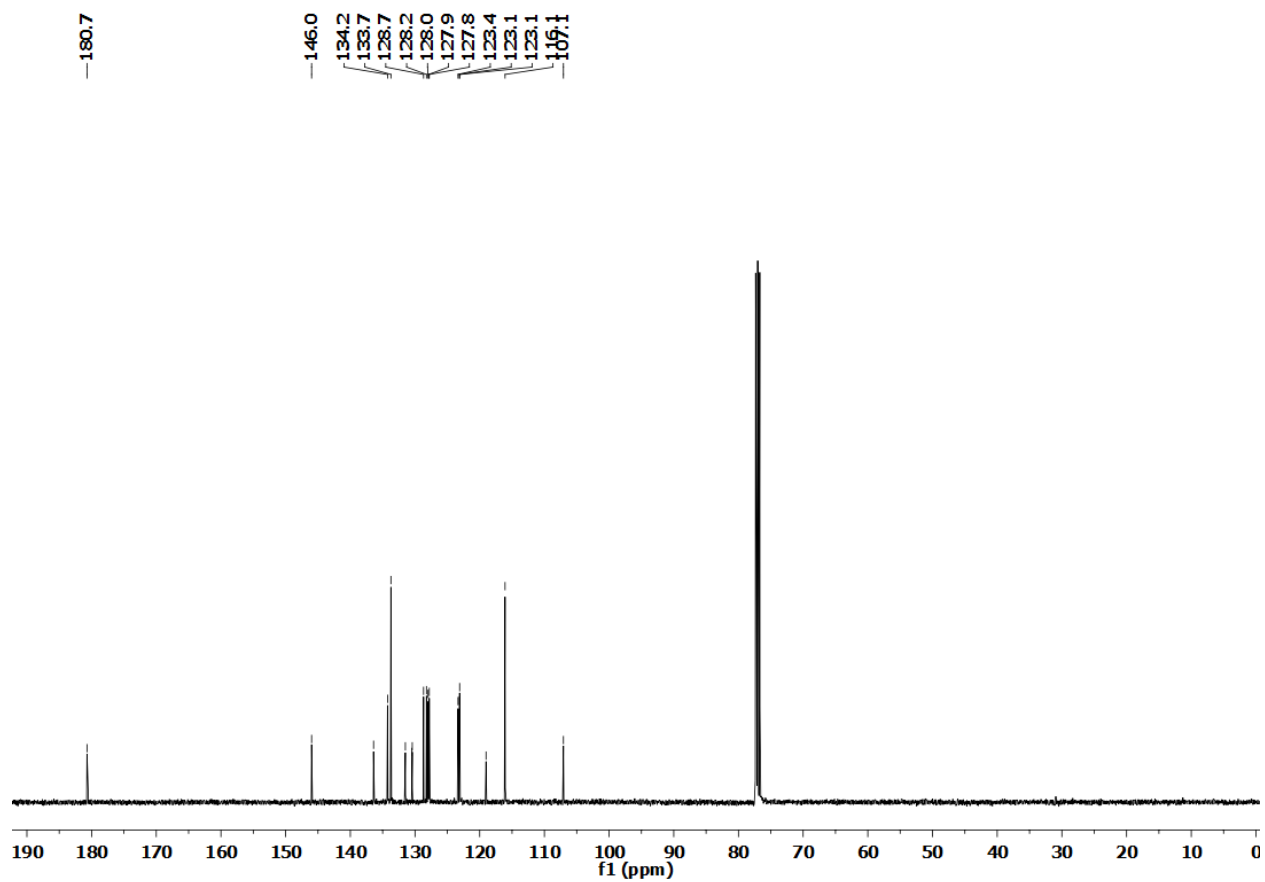

**Figure S5.**  $^{13}\text{C}$  NMR (100 MHz,  $\text{CDCl}_3$ , 298 K) spectrum of **3**.

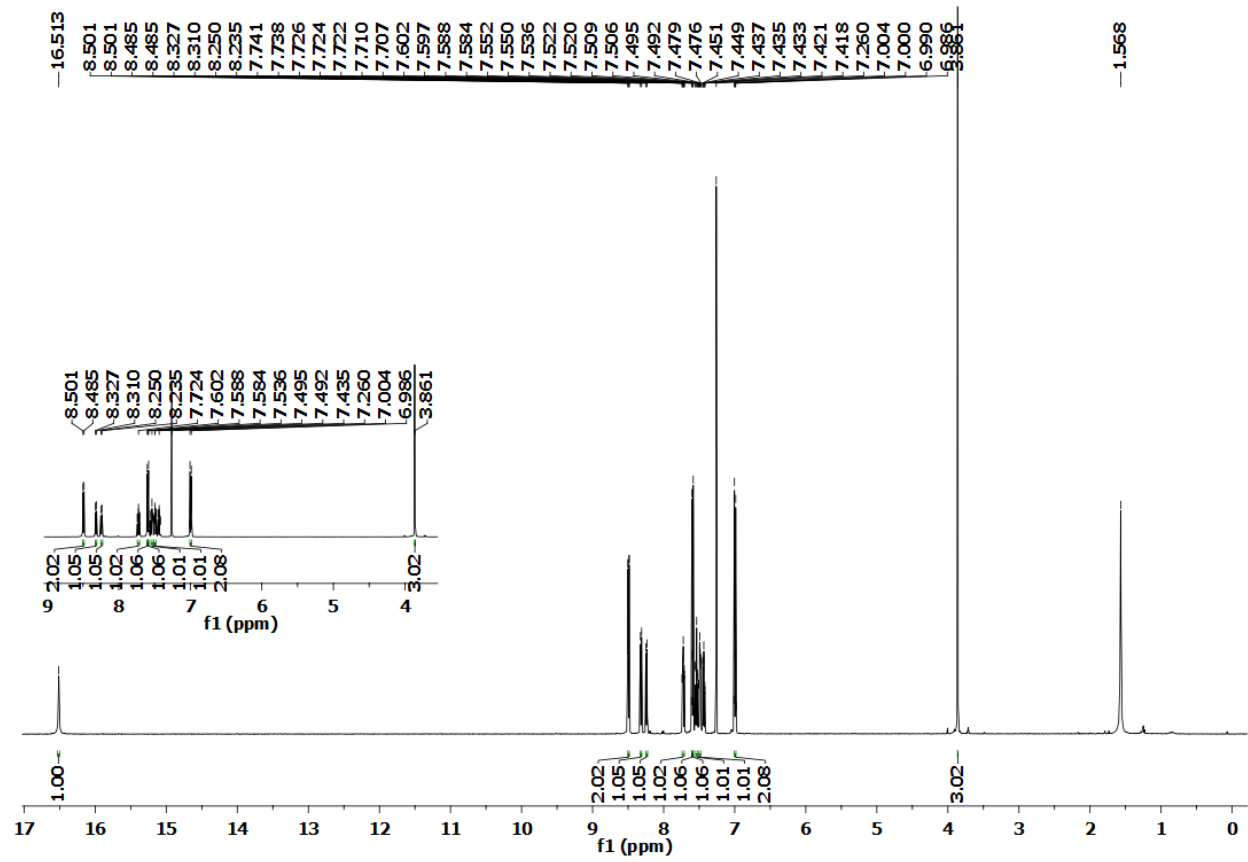

Figure S6.  $^1\text{H}$  NMR (400 MHz,  $\text{CDCl}_3$ , 298 K) spectrum of 4.



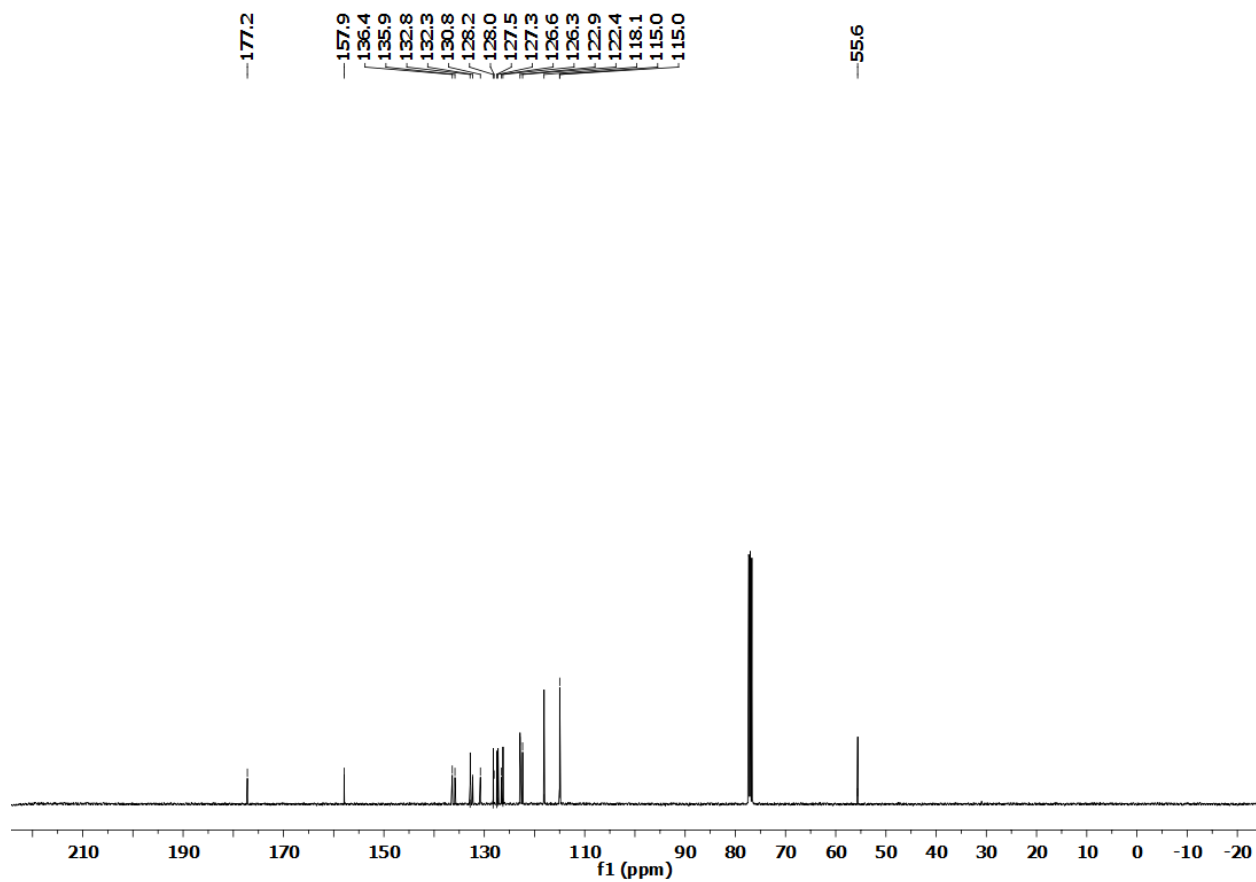

**Figure S7.**  $^{13}\text{C}$  NMR (100 MHz,  $\text{CDCl}_3$ , 298 K) spectrum of **4**.



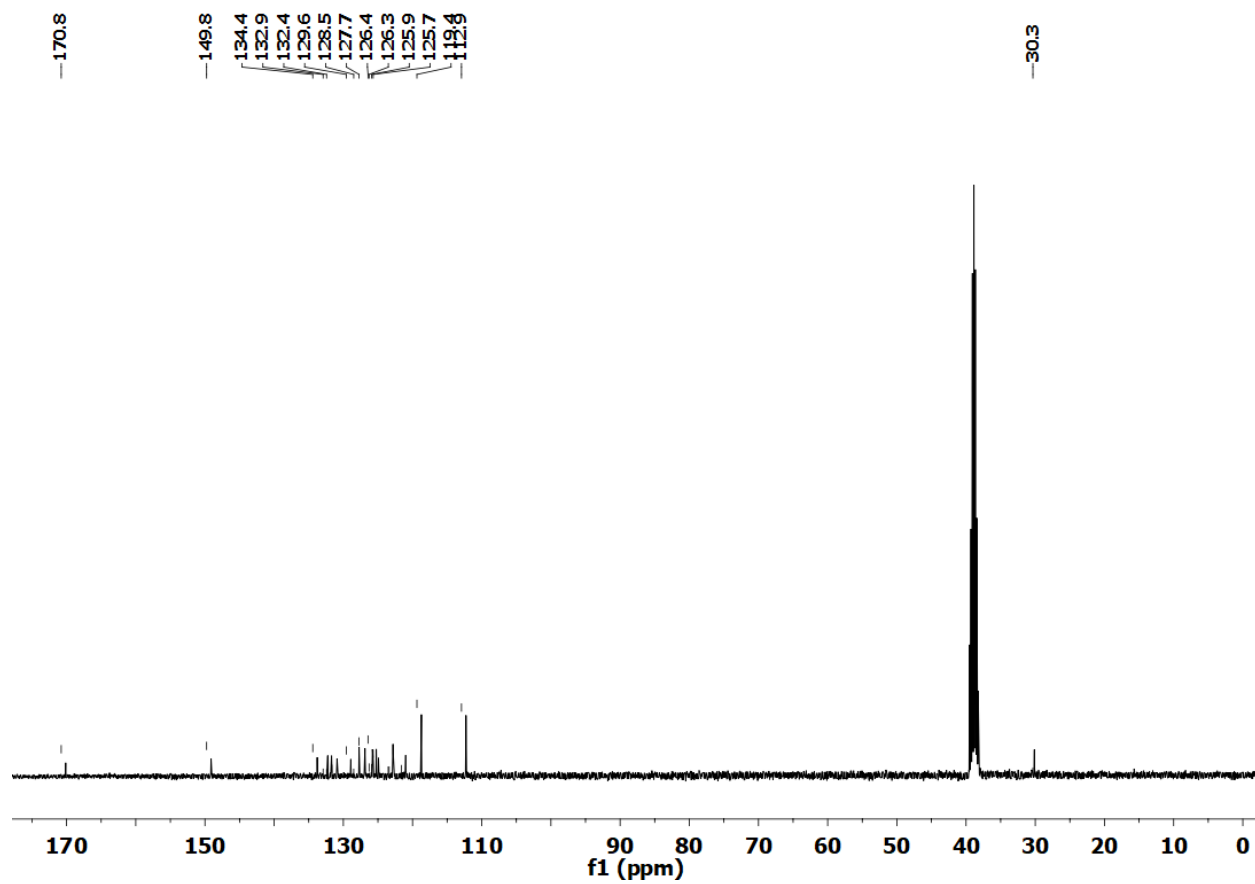

**Figure S9.**  $^{13}\text{C}$  NMR (125 MHz,  $\text{CDCl}_3$ , 298 K) spectrum of **5**.

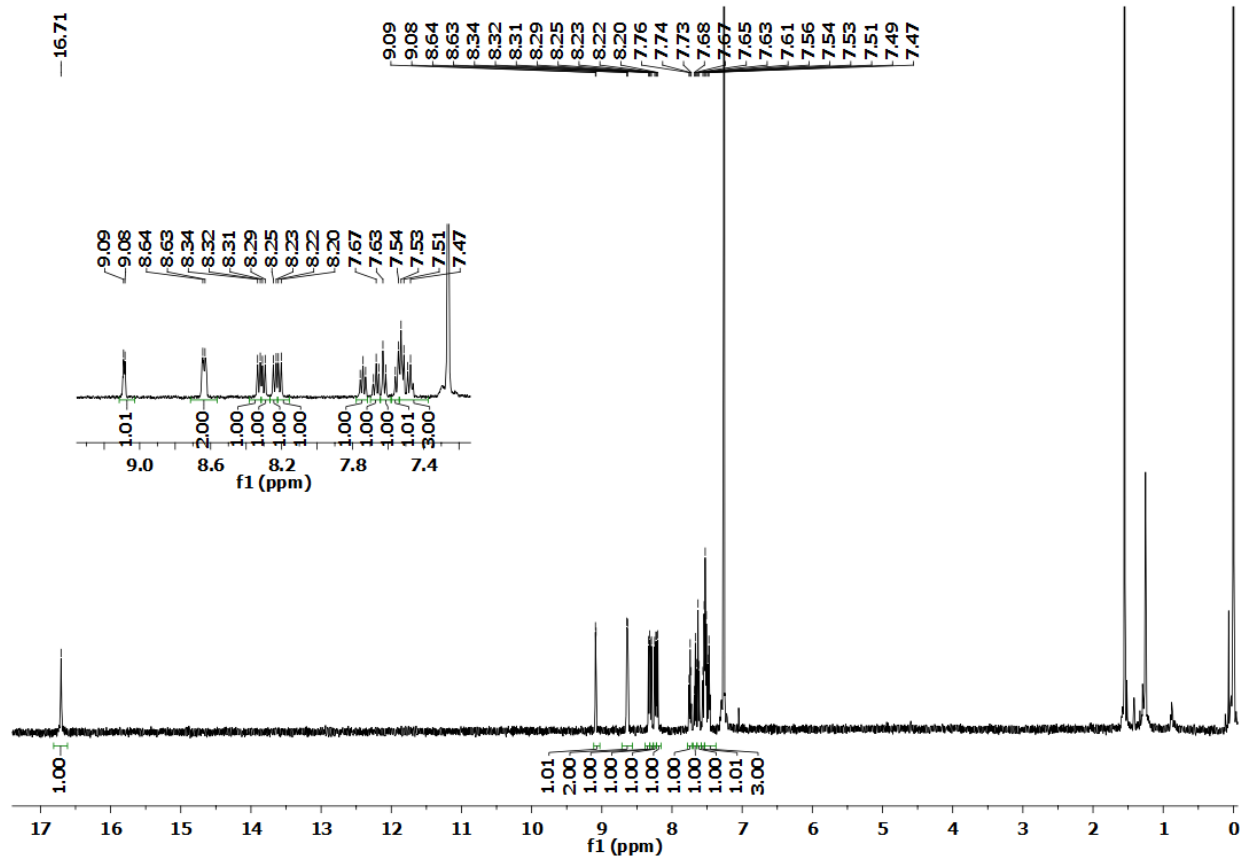

**Figure S10.**  $^1\text{H}$  NMR (400 MHz,  $\text{CDCl}_3$ , 298 K) spectrum of **6**.

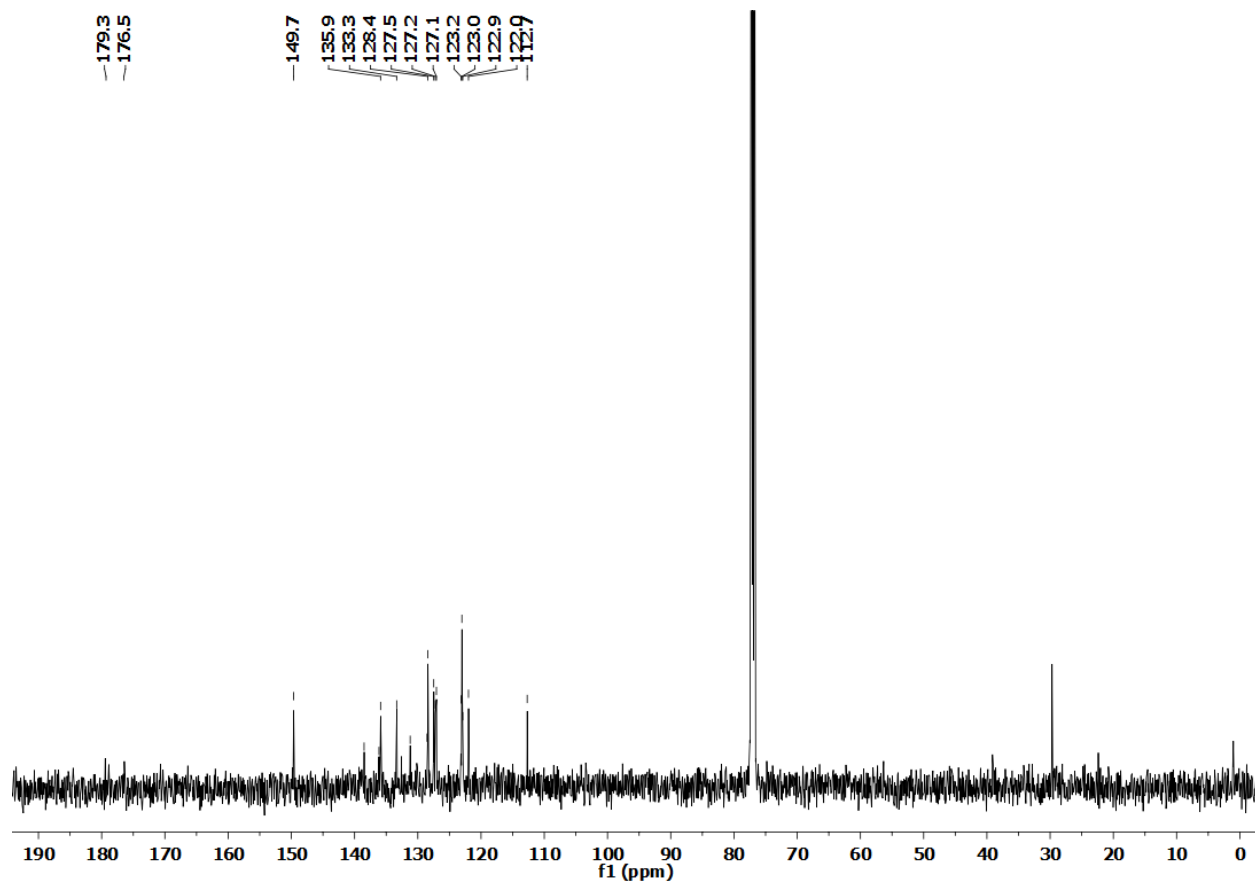

**Figure S11.**  $^{13}\text{C}$  NMR (100 MHz,  $\text{CDCl}_3$ , 298 K) spectrum of **6**. Compound has poor solubility in common organic solvent.

### 3. ESI-HRMS Characterization

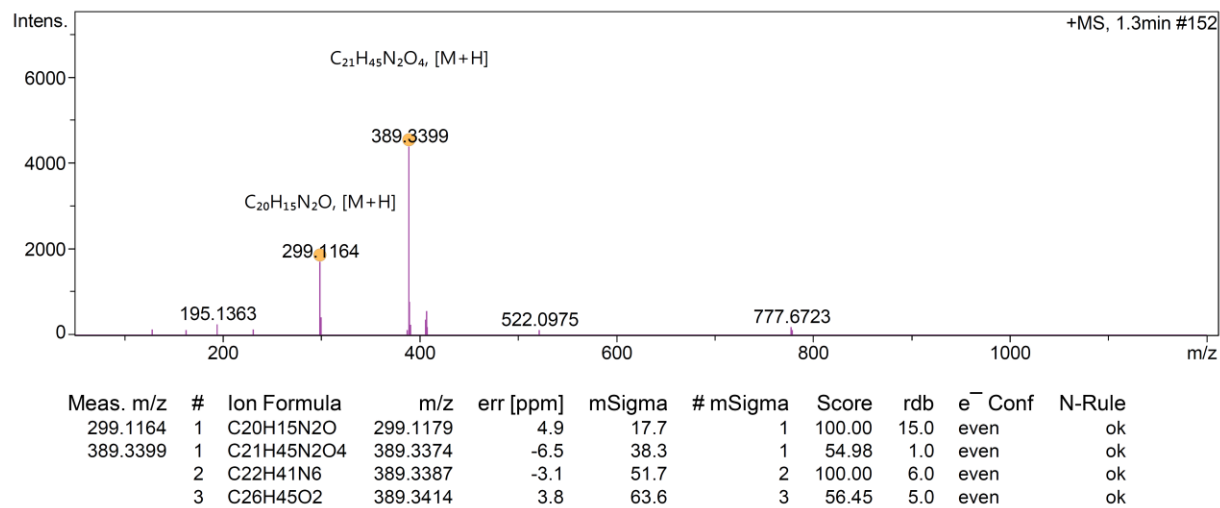

**Figure S12.** ESI-HRMS spectrum of compound **1**.



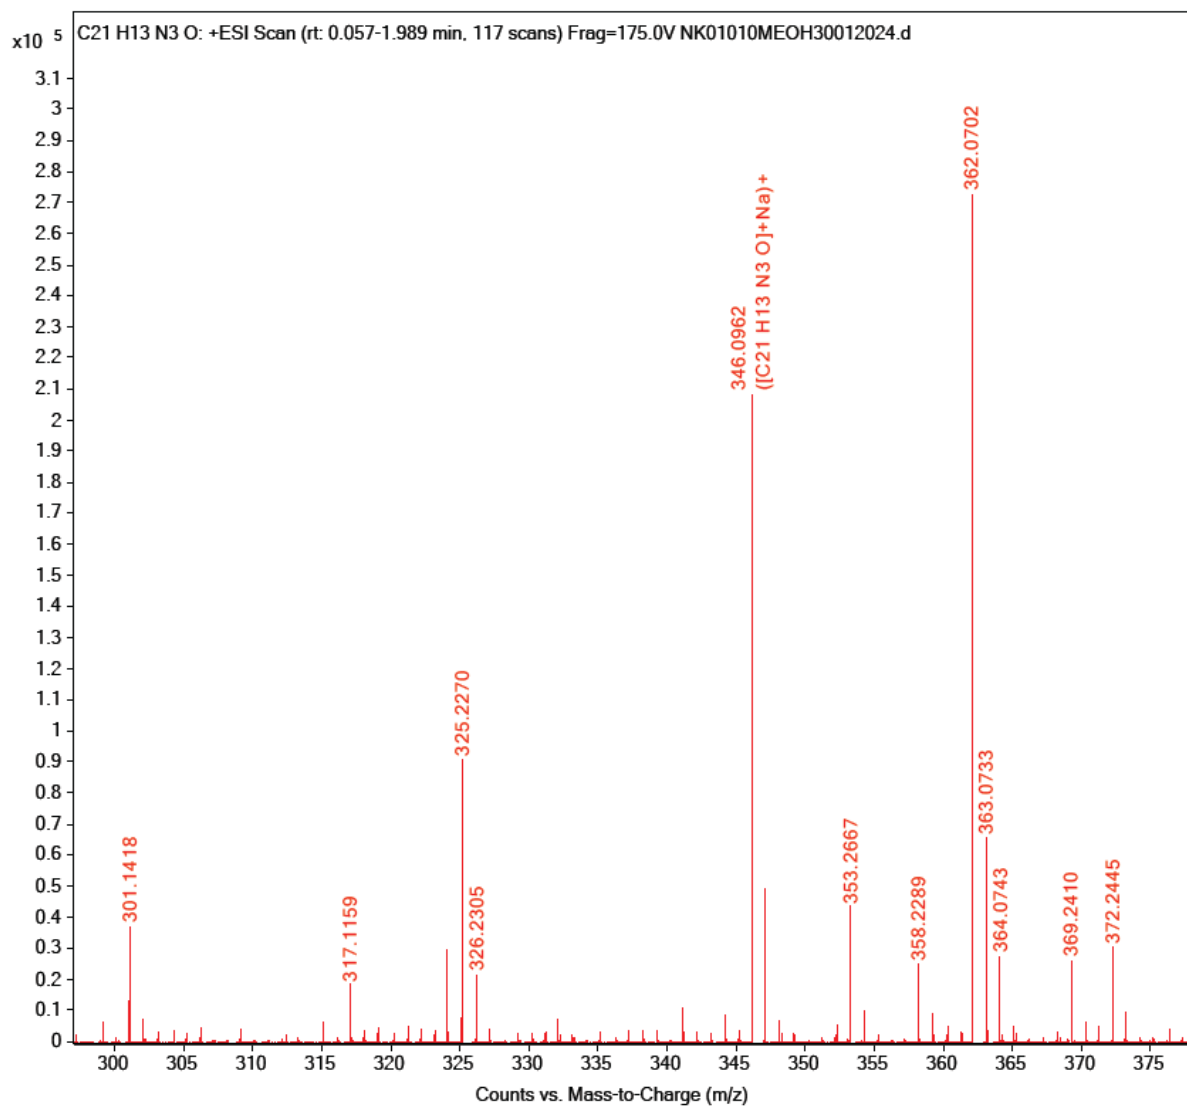

**Figure S14.** ESI-HRMS spectrum of compound **3**.



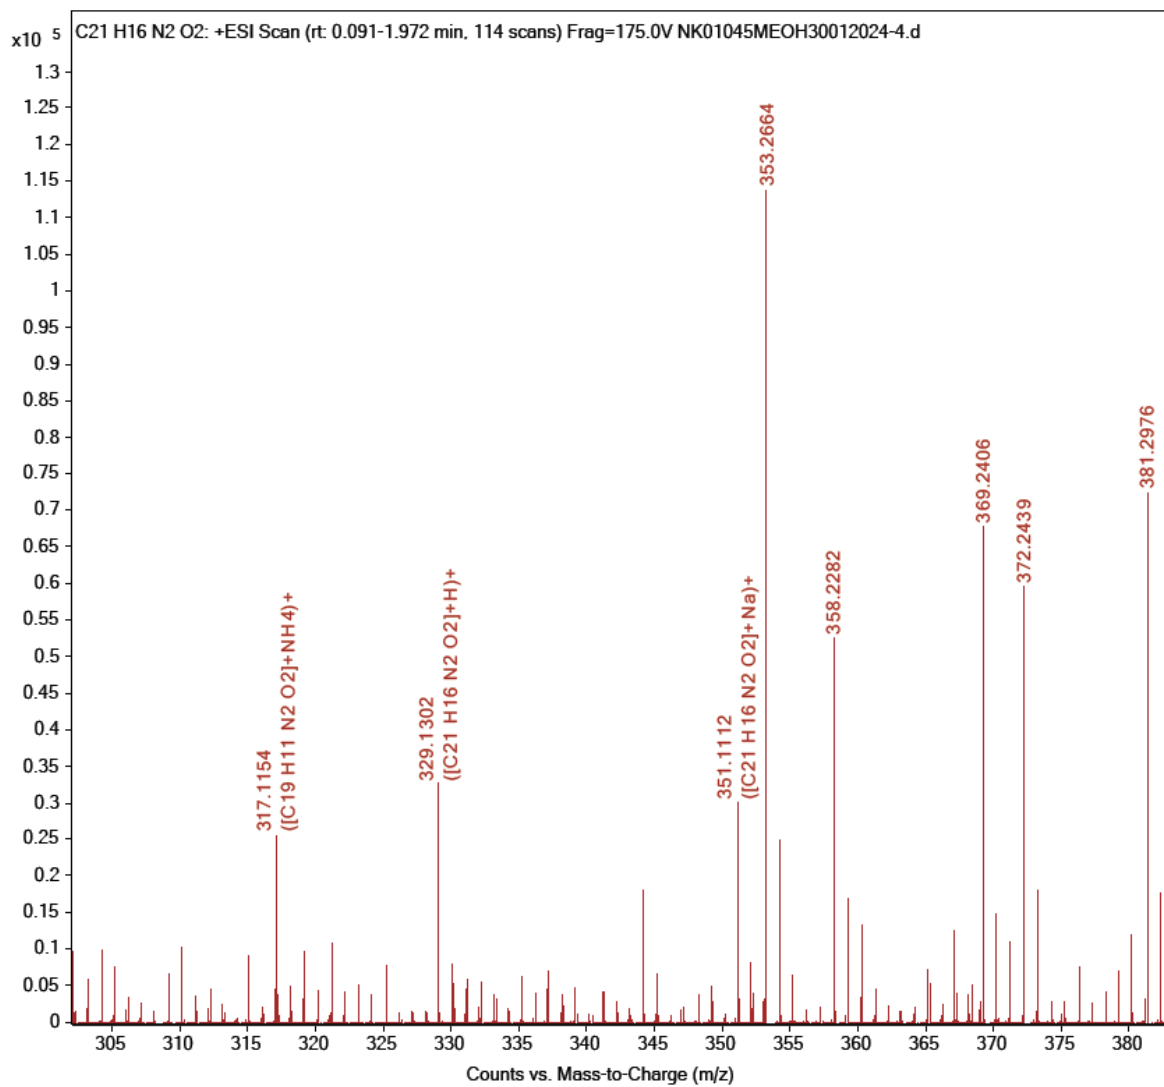

**Figure S15.** ESI-HRMS spectrum of compound **4**.

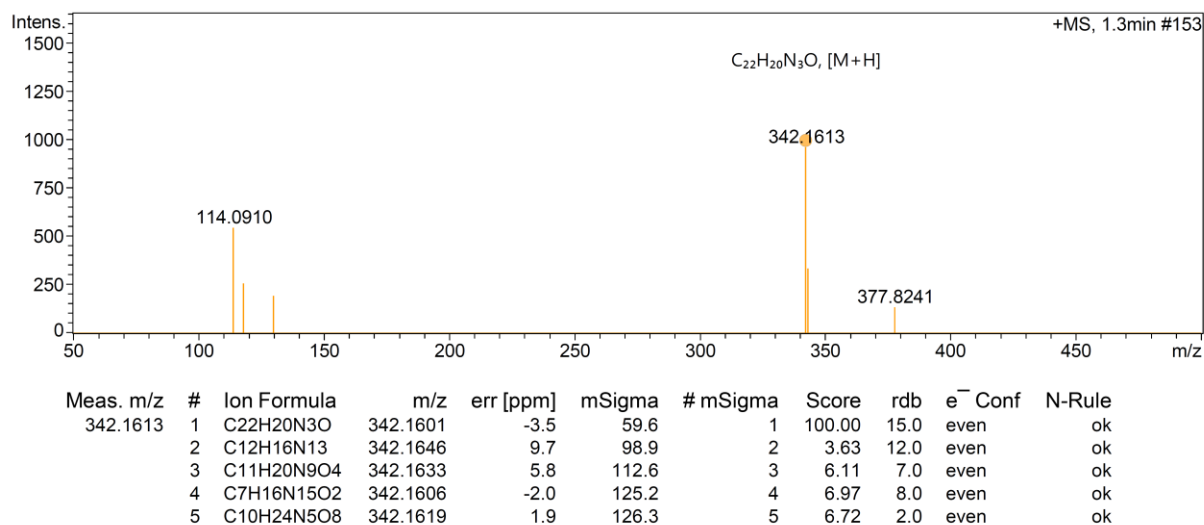

**Figure S16.** ESI-HRMS spectrum of compound 5.

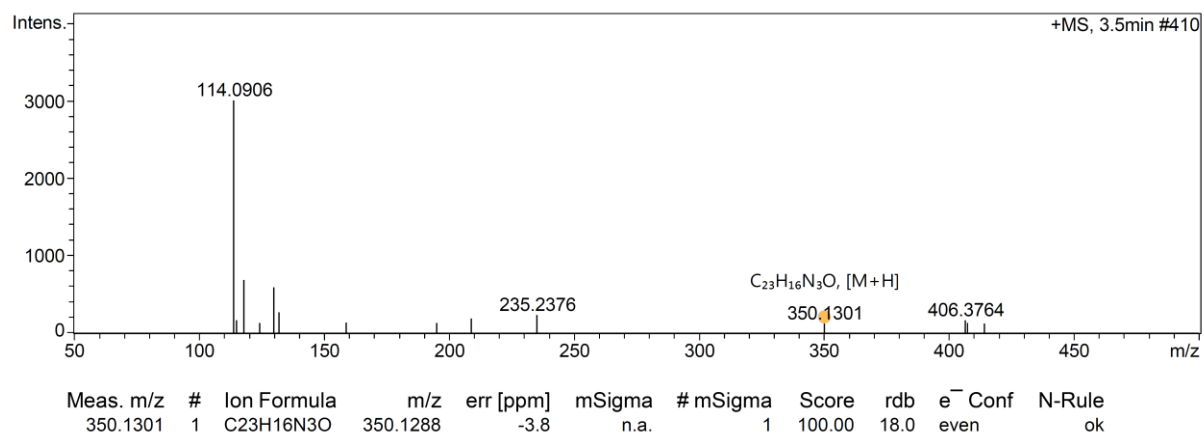

**Figure S17.** ESI-HRMS spectrum of compound 6.

## 4. Linear Free Energy Relationship

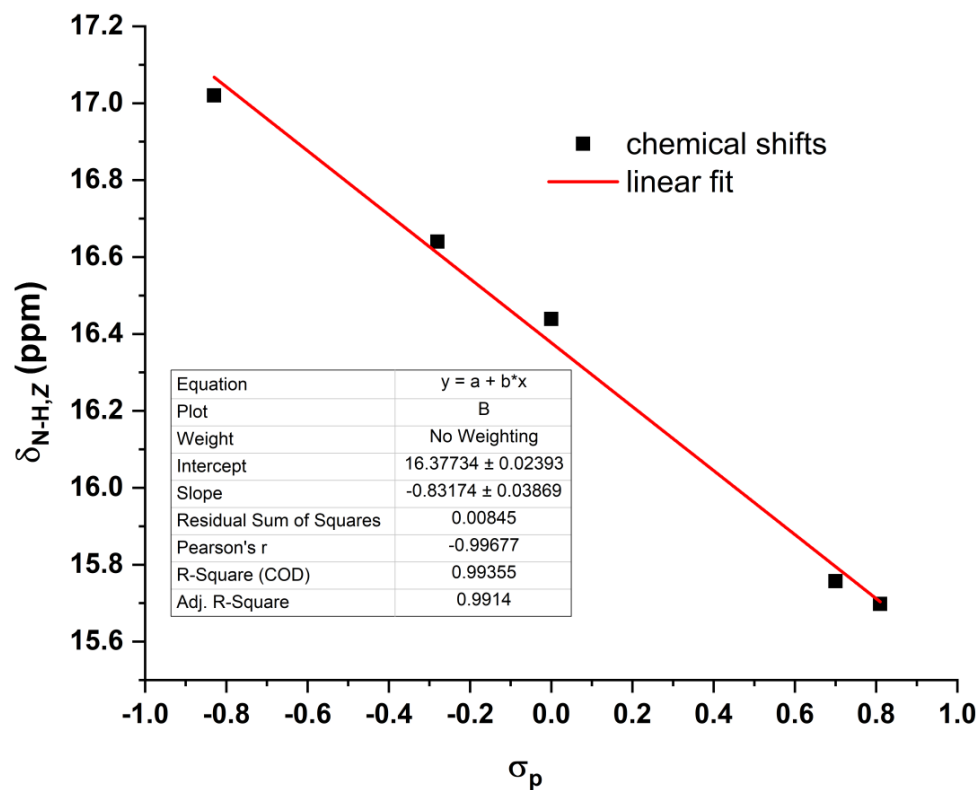

**Figure S18.** Hammett plot of  $\delta_{N-H}$  of different hydrazones (in their Z-form) vs. substituent constants ( $\sigma_p$ ).

## 5. Aggregation Studies of Hydrazones 1-6

### Monitored by UV-Vis and Fluorescence Spectrometers

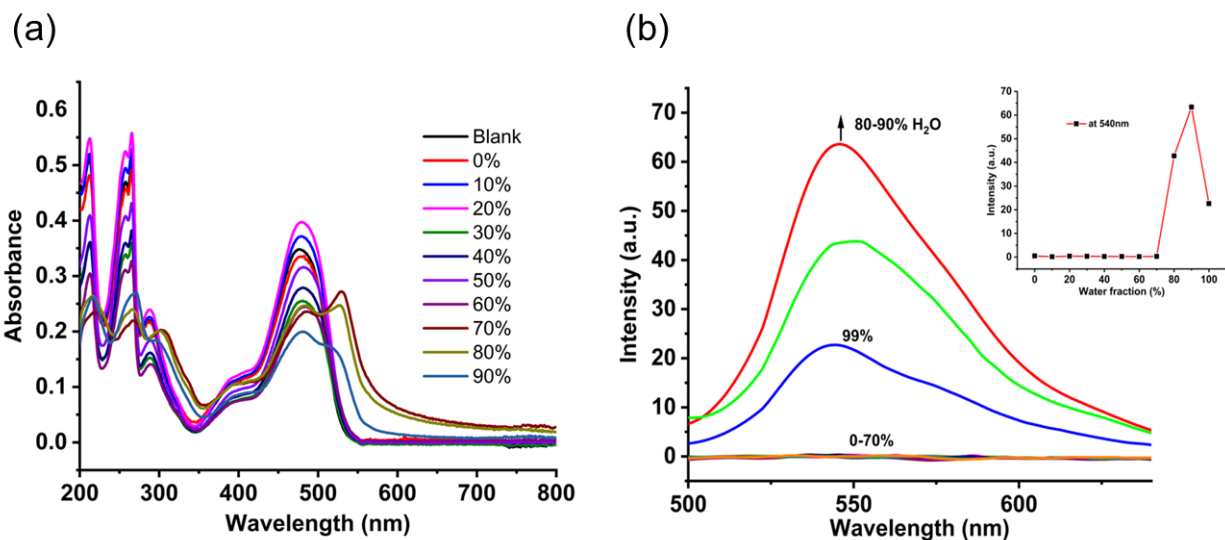

**Figure S19.** Change in (a) UV absorption and (b) emission spectra ( $\lambda_{\text{ex}} = 478$  nm) of **1** upon changing the water –acetonitrile ratio (at 298 K,  $10^{-5}$  M). Inset: showing change of emission at 540 nm.

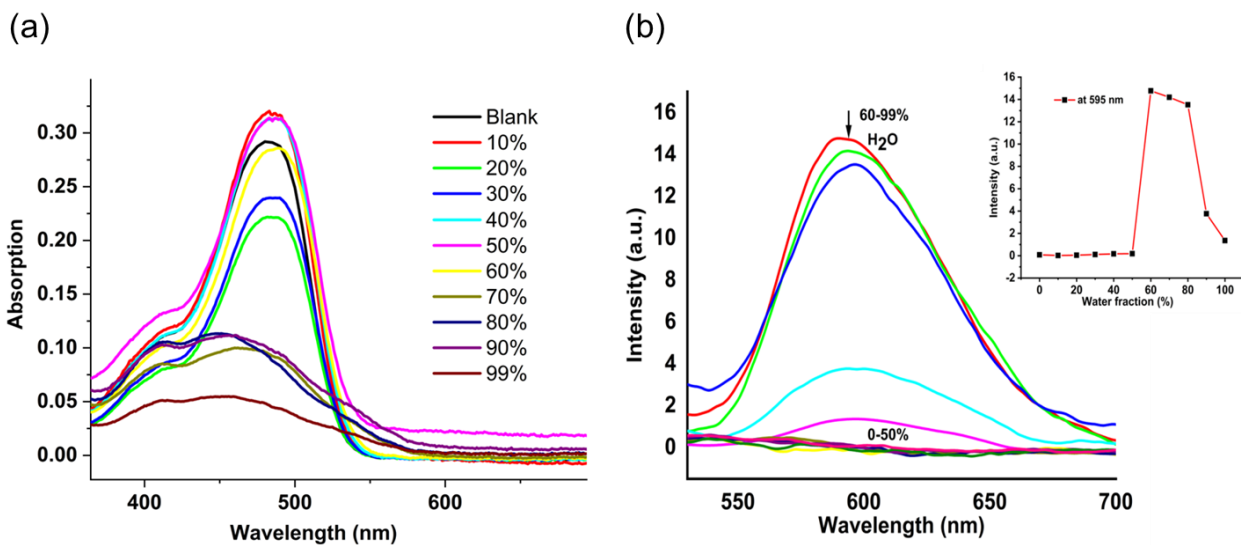

**Figure S20.** Change in (a) UV absorption and (b) emission spectra ( $\lambda_{\text{ex}} = 483$  nm) of **2** upon changing the water –acetonitrile ratio (at 298 K,  $10^{-5}$  M). Inset: showing change of emission at 595 nm.

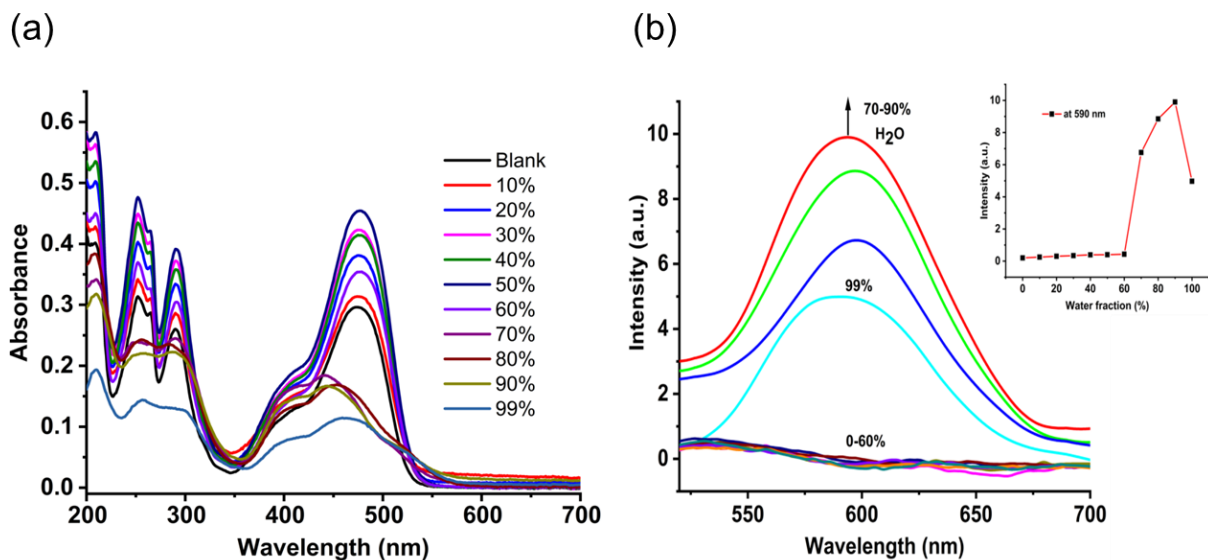

**Figure S21.** Change in (a) UV absorption and (b) emission spectra ( $\lambda_{\text{exc}} = 474 \text{ nm}$ ) of **3** upon changing the water –acetonitrile ratio (at 298 K,  $10^{-5} \text{ M}$ ). Inset: showing change of emission at 590 nm.

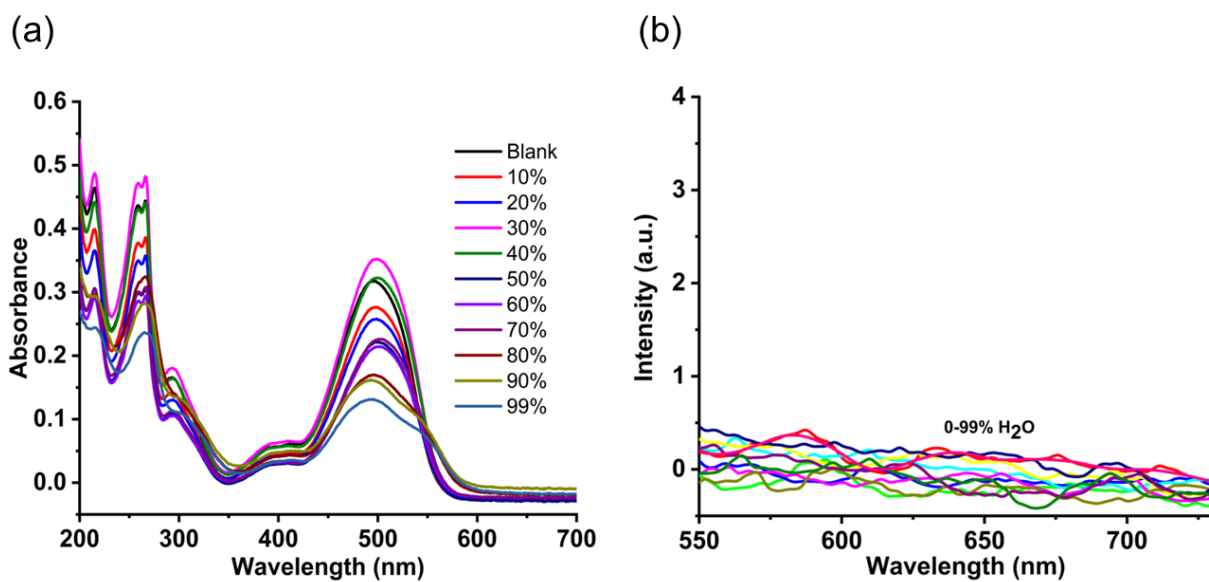

**Figure S22.** Change in (a) UV absorption and (b) emission spectra ( $\lambda_{\text{exc}} = 495 \text{ nm}$ ) of **4** upon changing the water –acetonitrile ratio (at 298 K,  $10^{-5} \text{ M}$ ).

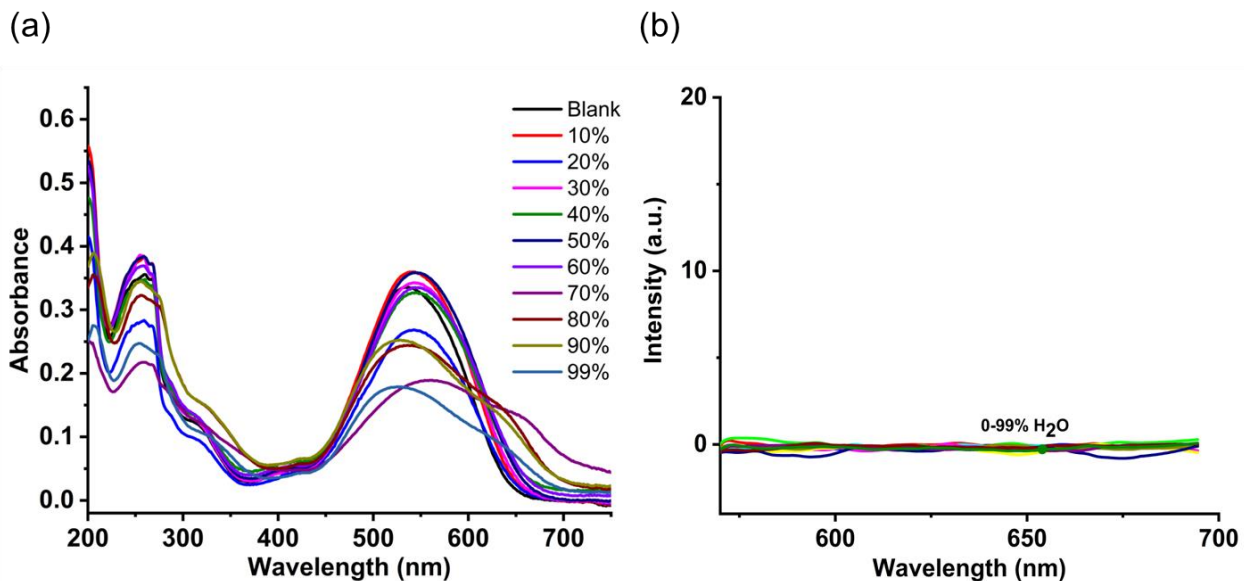

**Figure S23.** Change in (a) UV absorption and (b) emission spectra ( $\lambda_{\text{exc}} = 536 \text{ nm}$ ) of **5** upon changing the water –acetonitrile ratio (at 298 K,  $10^{-5} \text{ M}$ ).

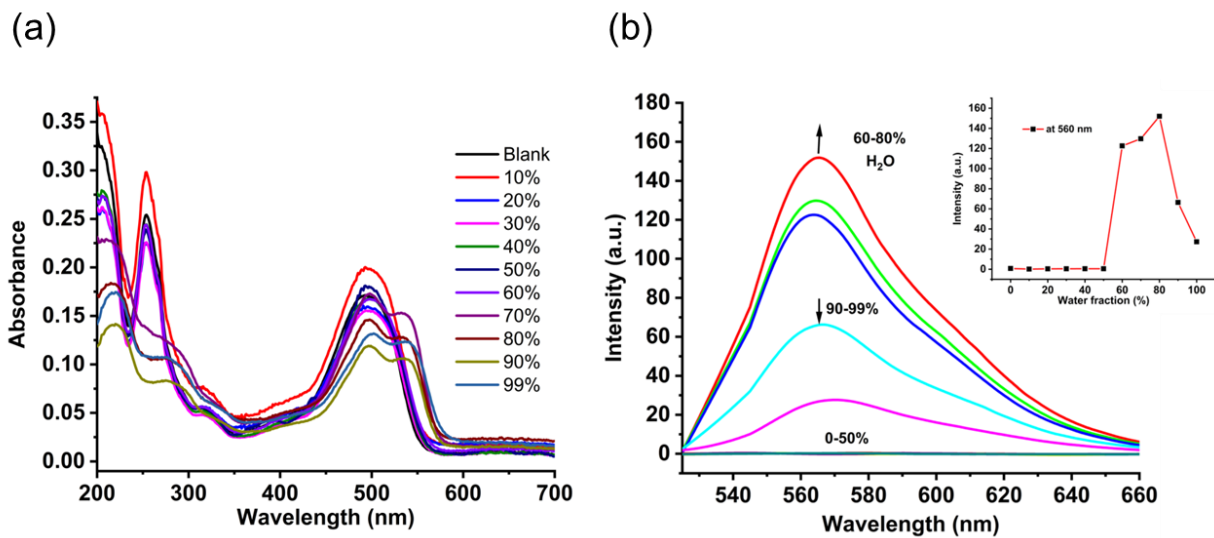

**Figure S24.** Change in (a) UV absorption and (b) emission spectra ( $\lambda_{\text{exc}} = 496 \text{ nm}$ ) of **6** upon changing the water –acetonitrile ratio (at 298 K,  $10^{-5} \text{ M}$ ). Inset: showing change of emission at 560 nm.

## 6. Solid State Emission and Powder XRD

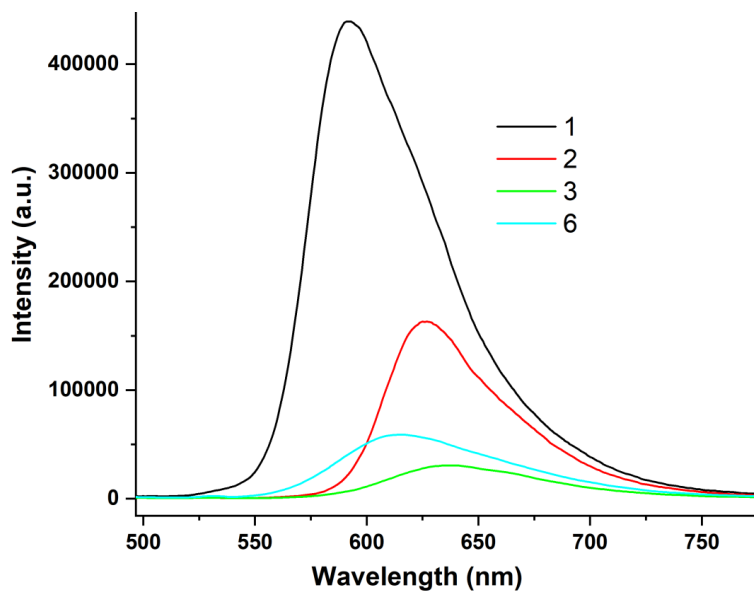

**Figure S25.** Emission spectra of compounds **1-3** and **6** recorded in their amorphous solid state. Excitation wavelengths are the  $\lambda_{\text{max}}$  obtained from their absorption spectra recorded in acetonitrile.

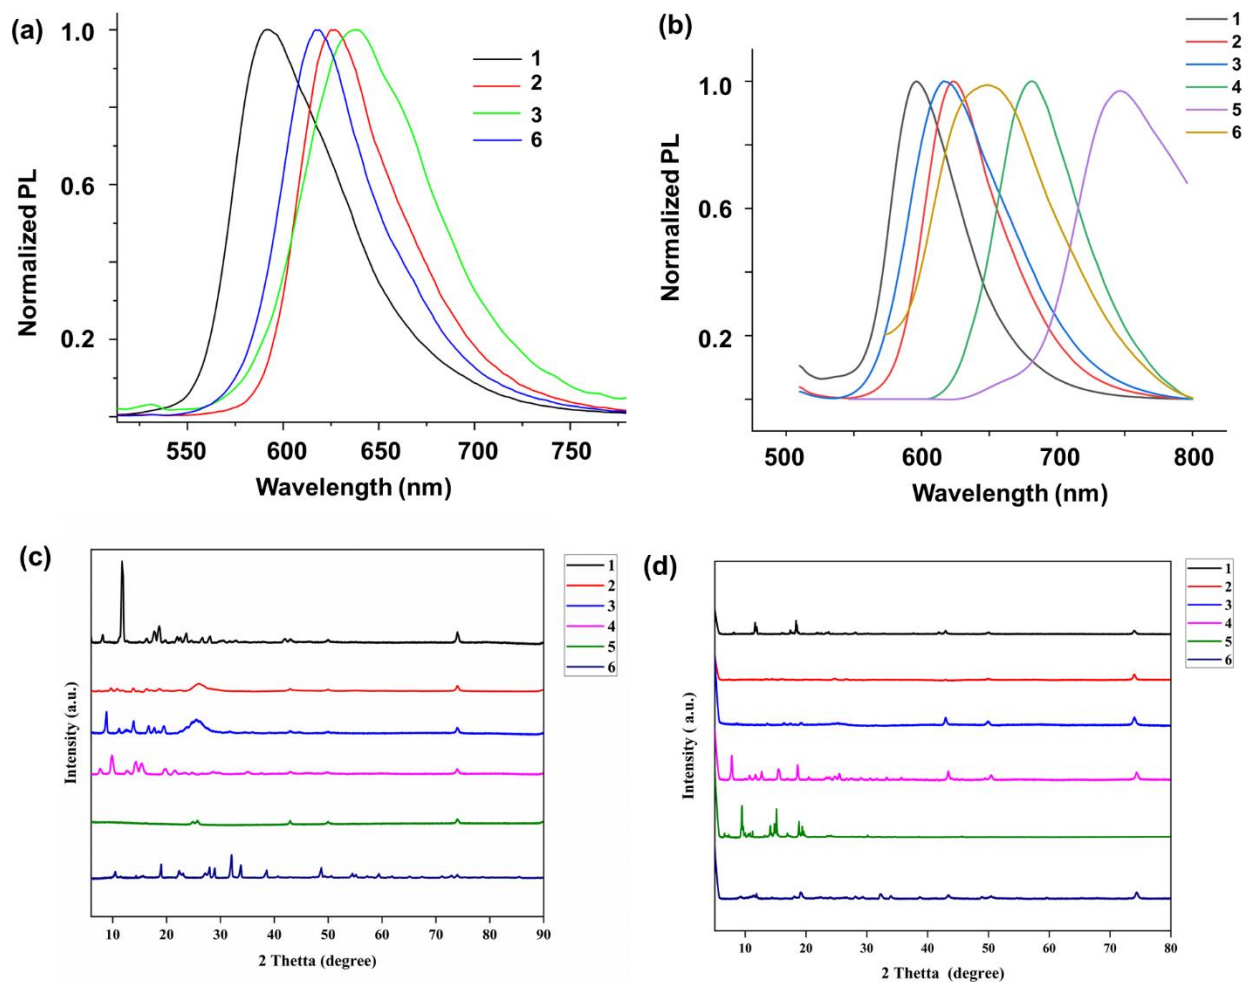

**Figure S26.** (a) Normalized emission spectra of compounds **1-3** and **6** recorded in their crystalline solid state. (b) Normalized emission of compounds **1-6** in their thin needle like crystals. The  $\lambda_{\text{max}}$  in acetonitrile were chosen for excitation. (c) and (d) X-Ray Diffraction (XRD) analysis of compound **1-6** in their crystalline solid and thin needle like crystals, respectively.



## 7. Fluorescence lifetime measurements

Time-correlated single photon counting (TCSPC) was used to measure fluorescence lifetime using Horiba–Jobin–Yvon Fluorolog FL3-111 spectrometer. The samples are excited at their  $\lambda_{\text{max}}$  observed from their absorption spectra in acetonitrile.

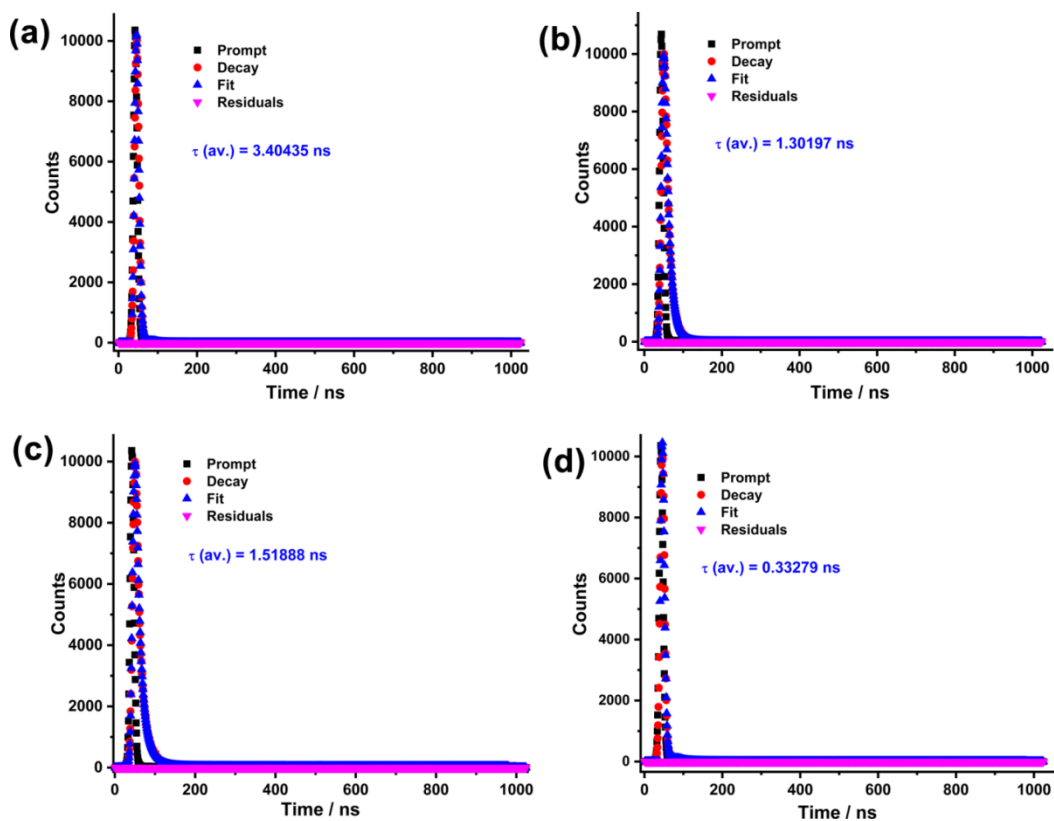

**Figure S27.** Fluorescence life-time profiles of the compound of (a) **1** ( $\lambda_{\text{ex}} = 478$  nm); (b) **2** ( $\lambda_{\text{ex}} = 483$  nm); (c) **3** ( $\lambda_{\text{ex}} = 474$ ) and (d) **6** ( $\lambda_{\text{ex}} = 4896$  nm) in their aggregated state monitored at maximum emission wavelengths (at 298 K,  $10^{-5}$  M).

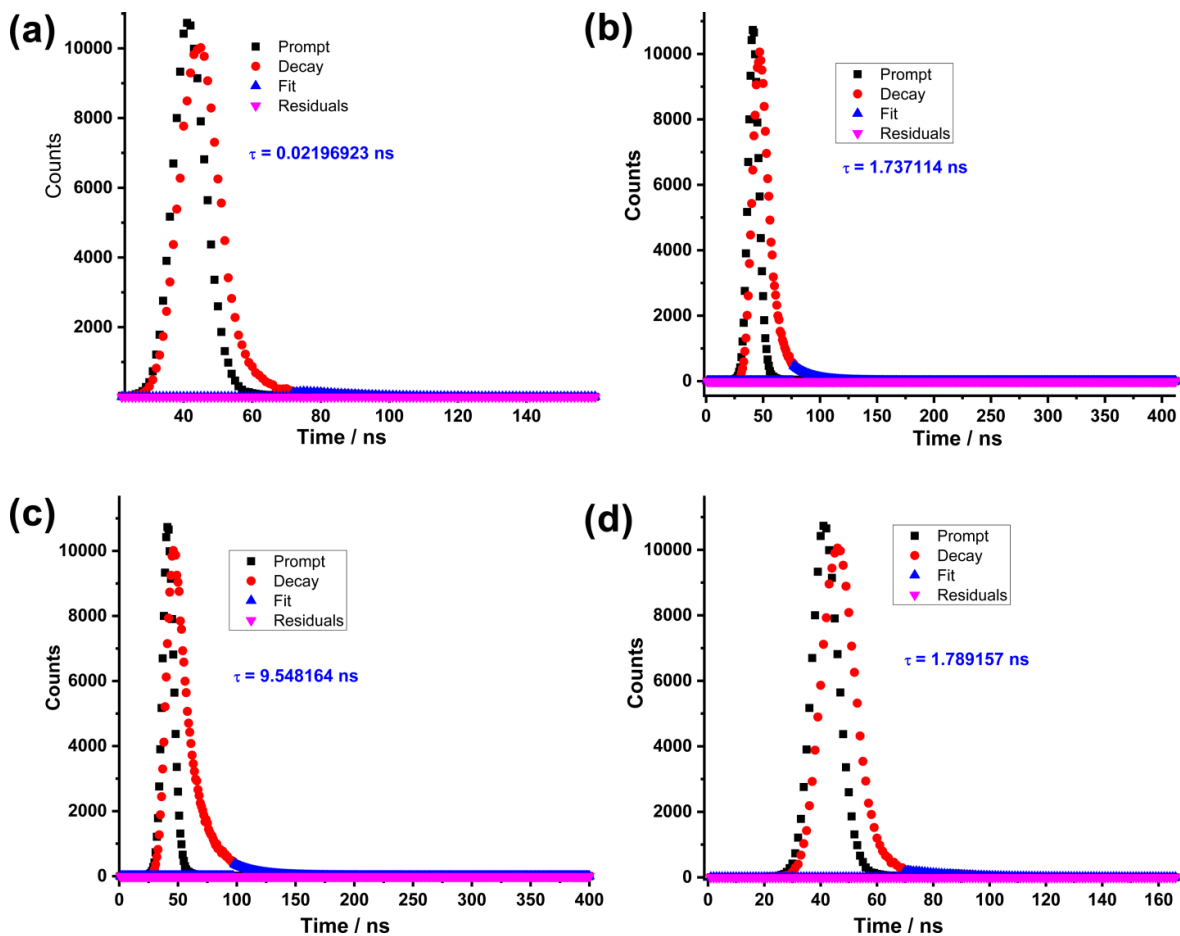

**Figure S28.** Fluorescence life-time profiles of the compound of (a) **1** ( $\lambda_{\text{ex}} = 478$  nm); (b) **2** ( $\lambda_{\text{ex}} = 483$  nm); (c) **3** ( $\lambda_{\text{ex}} = 474$ ) and (d) **6** ( $\lambda_{\text{ex}} = 4896$  nm) in their amorphous solids monitored at maximum emission wavelengths (at 298 K).

## 8. X-ray crystallography

**Table S1.** Crystal data and structure refinement for compound **1**.

|                                                     |                                                                                                                                  |
|-----------------------------------------------------|----------------------------------------------------------------------------------------------------------------------------------|
| Empirical formula                                   | C <sub>20</sub> H <sub>14</sub> N <sub>2</sub> O                                                                                 |
| Formula weight                                      | 298.33                                                                                                                           |
| Temperature                                         | 273(2) K                                                                                                                         |
| Wavelength                                          | 0.71073 Å                                                                                                                        |
| Crystal system                                      | Monoclinic                                                                                                                       |
| Space group                                         | <i>P</i> 2 <sub>1</sub> / <i>c</i>                                                                                               |
| Unit cell dimensions                                | <i>a</i> = 15.1687(11) Å      α = 90°.<br><i>b</i> = 15.6842(10) Å      β = 101.468(2)°.<br><i>c</i> = 6.4380(4) Å      γ = 90°. |
| Volume                                              | 1501.08(17) Å <sup>3</sup>                                                                                                       |
| <i>Z</i>                                            | 4                                                                                                                                |
| Density (calculated)                                | 1.320 Mg/m <sup>3</sup>                                                                                                          |
| Absorption coefficient                              | 0.083 mm <sup>-1</sup>                                                                                                           |
| F(000)                                              | 624                                                                                                                              |
| Crystal size                                        | 0.250 x 0.190 x 0.140 mm <sup>3</sup>                                                                                            |
| Theta range for data collection                     | 2.937 to 24.999°.                                                                                                                |
| Index ranges                                        | -18 ≤ <i>h</i> ≤ 18, -18 ≤ <i>k</i> ≤ 18, -7 ≤ <i>l</i> ≤ 7                                                                      |
| Reflections collected                               | 32645                                                                                                                            |
| Independent reflections                             | 2622 [ <i>R</i> ( <i>int</i> ) = 0.0615]                                                                                         |
| Completeness to theta = 24.999°                     | 99.4 %                                                                                                                           |
| Absorption correction                               | Semi-empirical from equivalents                                                                                                  |
| Max. and min. transmission                          | 0.989 and 0.980                                                                                                                  |
| Refinement method                                   | Full-matrix least-squares on <i>F</i> <sup>2</sup>                                                                               |
| Data / restraints / parameters                      | 2622 / 0 / 208                                                                                                                   |
| Goodness-of-fit on <i>F</i> <sup>2</sup>            | 1.075                                                                                                                            |
| Final <i>R</i> indices [ <i>I</i> > 2σ( <i>I</i> )] | <i>R</i> 1 = 0.0511, <i>wR</i> 2 = 0.1119                                                                                        |
| <i>R</i> indices (all data)                         | <i>R</i> 1 = 0.0650, <i>wR</i> 2 = 0.1188                                                                                        |
| Extinction coefficient                              | n/a                                                                                                                              |
| Largest diff. peak and hole                         | 0.130 and -0.139 e.Å <sup>-3</sup>                                                                                               |

$$R1 = \frac{\sum ||F_o| - |F_c||}{\sum |F_o|}; wR2 = \left\{ \frac{\sum [w(F_o^2 - F_c^2)^2]}{\sum w(F_o^2)^2} \right\}^{1/2}.$$

**Table S2.** Crystal data and structure refinement for Compound **4**.

|                                                     |                                                                                                                        |
|-----------------------------------------------------|------------------------------------------------------------------------------------------------------------------------|
| Empirical formula                                   | C <sub>21</sub> H <sub>16</sub> N <sub>2</sub> O <sub>2</sub>                                                          |
| Formula weight                                      | 328.36                                                                                                                 |
| Temperature                                         | 273(2) K                                                                                                               |
| Wavelength                                          | 0.71073 Å                                                                                                              |
| Crystal system                                      | Orthorhombic                                                                                                           |
| Space group                                         | <i>Pna</i> 2 <sub>1</sub>                                                                                              |
| Unit cell dimensions                                | <i>a</i> = 24.6783(9) Å      α = 90°.<br><i>b</i> = 12.9905(4) Å      β = 90°.<br><i>c</i> = 5.0465(2) Å      γ = 90°. |
| Volume                                              | 1617.82(10) Å <sup>3</sup>                                                                                             |
| <i>Z</i>                                            | 4                                                                                                                      |
| Density (calculated)                                | 1.348 Mg/m <sup>3</sup>                                                                                                |
| Absorption coefficient                              | 0.088 mm <sup>-1</sup>                                                                                                 |
| <i>F</i> (000)                                      | 688                                                                                                                    |
| Crystal size                                        | 0.200 x 0.040 x 0.030 mm <sup>3</sup>                                                                                  |
| Theta range for data collection                     | 2.276 to 24.997°.                                                                                                      |
| Index ranges                                        | -29 ≤ <i>h</i> ≤ 29, -15 ≤ <i>k</i> ≤ 14, -6 ≤ <i>l</i> ≤ 6                                                            |
| Reflections collected                               | 15092                                                                                                                  |
| Independent reflections                             | 2836 [ <i>R</i> ( <i>int</i> ) = 0.0514]                                                                               |
| Completeness to theta = 25.242°                     | 99.9 %                                                                                                                 |
| Absorption correction                               | Semi-empirical from equivalents                                                                                        |
| Max. and min. transmission                          | 0.997 and 0.983                                                                                                        |
| Refinement method                                   | Full-matrix least-squares on <i>F</i> <sup>2</sup>                                                                     |
| Data / restraints / parameters                      | 2836 / 1 / 227                                                                                                         |
| Goodness-of-fit on <i>F</i> <sup>2</sup>            | 1.107                                                                                                                  |
| Final <i>R</i> indices [ <i>I</i> > 2σ( <i>I</i> )] | <i>R</i> 1 = 0.0485, <i>wR</i> 2 = 0.1070                                                                              |
| <i>R</i> indices (all data)                         | <i>R</i> 1 = 0.0620, <i>wR</i> 2 = 0.1128                                                                              |
| Absolute structure parameter                        | -0.6(10)                                                                                                               |
| Extinction coefficient                              | n/a                                                                                                                    |
| Largest diff. peak and hole                         | 0.124 and -0.115 e.Å <sup>-3</sup>                                                                                     |

$$R1 = \frac{\sum ||F_o| - |F_c||}{\sum |F_o|}; wR2 = \left\{ \frac{\sum [w(F_o^2 - F_c^2)^2]}{\sum w(F_o^2)^2} \right\}^{1/2}.$$

**Table S3.** Crystal data and structure refinement for compound **5**.

|                                                     |                                                                                                                                  |
|-----------------------------------------------------|----------------------------------------------------------------------------------------------------------------------------------|
| Empirical formula                                   | C <sub>22</sub> H <sub>21</sub> N <sub>3</sub> O <sub>2</sub>                                                                    |
| Formula weight                                      | 359.42                                                                                                                           |
| Temperature                                         | 273(2) K                                                                                                                         |
| Wavelength                                          | 0.71073 Å                                                                                                                        |
| Crystal system                                      | Tetragonal                                                                                                                       |
| Space group                                         | <i>I</i> -4                                                                                                                      |
| Unit cell dimensions                                | $a = 26.8526(11)$ Å $\alpha = 90^\circ$ .<br>$b = 26.8526(11)$ Å $\beta = 90^\circ$ .<br>$c = 5.0570(3)$ Å $\gamma = 90^\circ$ . |
| Volume                                              | 3646.4(4) Å <sup>3</sup>                                                                                                         |
| <i>Z</i>                                            | 8                                                                                                                                |
| Density (calculated)                                | 1.309 Mg/m <sup>3</sup>                                                                                                          |
| Absorption coefficient                              | 0.086 mm <sup>-1</sup>                                                                                                           |
| F(000)                                              | 1520                                                                                                                             |
| Crystal size                                        | 0.604 x 0.047 x 0.039 mm <sup>3</sup>                                                                                            |
| Theta range for data collection                     | 2.145 to 24.990°.                                                                                                                |
| Index ranges                                        | -31 ≤ <i>h</i> ≤ 31, -31 ≤ <i>k</i> ≤ 30, -6 ≤ <i>l</i> ≤ 6                                                                      |
| Reflections collected                               | 8663                                                                                                                             |
| Independent reflections                             | 3190 [ <i>R</i> ( <i>int</i> ) = 0.0523]                                                                                         |
| Completeness to theta = 24.990°                     | 99.9 %                                                                                                                           |
| Absorption correction                               | Semi-empirical from equivalents                                                                                                  |
| Max. and min. transmission                          | 0.997 and 0.954                                                                                                                  |
| Refinement method                                   | Full-matrix least-squares on F <sup>2</sup>                                                                                      |
| Data / restraints / parameters                      | 3190 / 0 / 237                                                                                                                   |
| Goodness-of-fit on F <sup>2</sup>                   | 1.095                                                                                                                            |
| Final <i>R</i> indices [ <i>I</i> > 2σ( <i>I</i> )] | <i>R</i> 1 = 0.0681, <i>wR</i> 2 = 0.1363                                                                                        |
| <i>R</i> indices (all data)                         | <i>R</i> 1 = 0.0988, <i>wR</i> 2 = 0.1502                                                                                        |
| Absolute structure parameter                        | 0.2(10)                                                                                                                          |
| Extinction coefficient                              | n/a                                                                                                                              |
| Largest diff. peak and hole                         | 0.163 and -0.185 e.Å <sup>-3</sup>                                                                                               |

$$R1 = \frac{\sum ||F_o| - |F_c||}{\sum |F_o|}; wR2 = \left\{ \frac{\sum [w(F_o^2 - F_c^2)^2]}{\sum w(F_o^2)^2} \right\}^{1/2}.$$

## 9. DFT Calculations

The geometry optimizations of compounds **1-4** and **6** were carried out using DFT method with the Gaussian 16 using the B3LYP/6-31+g(d,p) basis set. Time dependent density functional (TD-DFT) calculations were carried out using the B3LYP/6-31+g\*. The comparison between the experimental and calculated data, and ground state optimized structures are summarized Table S4 and Table S5, respectively.

**Table S4.** Comparison of photophysical properties between the experimental and calculated data of the hydrazones.

| Hydrazones | $\lambda_{\max}(\text{nm})^{[a]}$ | $\lambda_{\max/\text{keto}}(\text{nm})^{[b]}$ | $\lambda_{\max/\text{enol}}(\text{nm})^{[b]}$ |
|------------|-----------------------------------|-----------------------------------------------|-----------------------------------------------|
| <b>1</b>   | 478                               | 449                                           | 452                                           |
| <b>2</b>   | 483                               | 473                                           | 500                                           |
| <b>3</b>   | 474                               | 461                                           | 476                                           |
| <b>4</b>   | 495                               | 467                                           | 457                                           |
| <b>5</b>   | 536                               | 502                                           | 503                                           |
| <b>6</b>   | 496                               | 470                                           | 574                                           |

<sup>[a]</sup> Experimental data in acetonitrile. <sup>[b]</sup> Theoretical data obtained from TD-DFT simulation.

**Table S5.** Summarizing optimized structures, H-bond distances and angles, and the dihedral angles between upper and lower part of the hydrazone compounds.

| Hydrazone | Top view                                                                            | Side view                                                                           | N-H...O=C (Å/°) | $\Theta_{(\text{top}/\text{bottom})}$ (°) |
|-----------|-------------------------------------------------------------------------------------|-------------------------------------------------------------------------------------|-----------------|-------------------------------------------|
| s         |                                                                                     |                                                                                     |                 |                                           |
| <b>1</b>  | 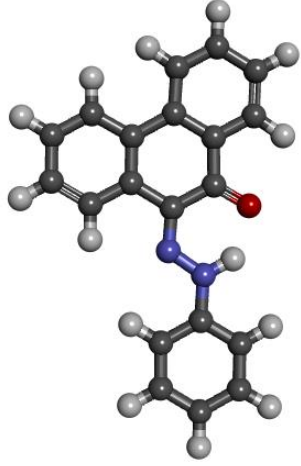   |    | 2.556/135.69    | 179.96                                    |
| <b>2</b>  |   |   | 2.555/135.40    | 179.99                                    |
| <b>3</b>  |  |  | 2.554/135.51    | 179.99                                    |

|   |                                                                                     |                                                                                     |              |        |
|---|-------------------------------------------------------------------------------------|-------------------------------------------------------------------------------------|--------------|--------|
| 4 | 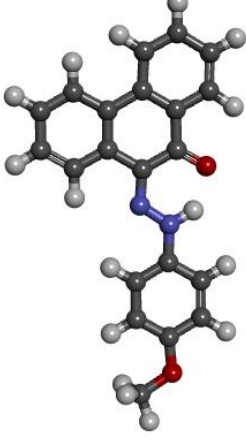   |    | 2.550/136.28 | 179.99 |
| 5 |   |   | 2.547/136.81 | 179.91 |
| 6 |  |  | 2.577/130.46 | 179.99 |



## Keto-form

### Hydrazone-1

| Atom | X           | Y           | Z           |
|------|-------------|-------------|-------------|
| C    | -4.03205000 | -2.88982300 | 0.00023200  |
| C    | -2.66336200 | -2.67877900 | -0.00029700 |
| C    | -2.13783700 | -1.37504000 | -0.00035500 |
| C    | -2.99456500 | -0.24707400 | 0.00012400  |
| C    | -4.38276200 | -0.49162600 | 0.00064500  |
| C    | -4.89168700 | -1.78339500 | 0.00070600  |
| H    | -4.43421900 | -3.89813700 | 0.00027200  |
| H    | -1.96093000 | -3.50482600 | -0.00068500 |
| H    | -5.08157600 | 0.33612800  | 0.00101400  |
| H    | -5.96781300 | -1.93166100 | 0.00111900  |
| C    | -2.42915200 | 1.11400000  | 0.00002100  |
| C    | -3.25205300 | 2.25817100  | 0.00023100  |
| C    | -1.02224700 | 1.29725900  | -0.00026700 |
| C    | -2.72056100 | 3.53864900  | 0.00016200  |
| H    | -4.32998200 | 2.14785000  | 0.00045100  |
| C    | -0.49929900 | 2.60466500  | -0.00031900 |
| C    | -1.33155500 | 3.71226000  | -0.00011200 |
| H    | -3.38261700 | 4.39919900  | 0.00032700  |
| H    | 0.57663500  | 2.72861500  | -0.00052700 |
| H    | -0.90395600 | 4.71057000  | -0.00015700 |
| C    | -0.12259700 | 0.13442800  | -0.00046900 |
| C    | -0.67254900 | -1.22402800 | -0.00097100 |
| O    | 0.07223000  | -2.23146100 | -0.00102500 |
| N    | 1.18030700  | 0.38425200  | -0.00005900 |
| N    | 2.04166900  | -0.60193700 | 0.00014300  |
| H    | 1.64684800  | -1.55618000 | 0.00038400  |
| C    | 3.42308500  | -0.37067200 | 0.00017400  |
| C    | 4.26987200  | -1.48908300 | 0.00049900  |
| C    | 3.96576600  | 0.92230200  | -0.00009500 |
| C    | 5.65076800  | -1.31203600 | 0.00054800  |
| H    | 3.84216100  | -2.48788400 | 0.00071500  |
| C    | 5.34814400  | 1.08180500  | -0.00004200 |
| H    | 3.30083100  | 1.77685600  | -0.00033800 |
| C    | 6.19834300  | -0.02778100 | 0.00027800  |
| H    | 6.29968100  | -2.18260100 | 0.00080300  |
| H    | 5.76586500  | 2.08434200  | -0.00025200 |
| H    | 7.27518800  | 0.10799700  | 0.00031900  |

## Hydrazone-2

| Atom | X           | Y           | Z           |
|------|-------------|-------------|-------------|
| C    | -3.69453200 | -2.65900800 | -0.00002500 |
| C    | -3.14988300 | -1.36305100 | 0.00000400  |
| C    | -3.98852500 | -0.22167400 | -0.00006300 |
| C    | -5.37938100 | -0.44441000 | -0.00018300 |
| C    | -5.90804600 | -1.72892700 | -0.00021500 |
| C    | -5.06649500 | -2.84861500 | -0.00013000 |
| H    | -3.00607500 | -3.49664000 | 0.00003300  |
| H    | -6.06586300 | 0.39337600  | -0.00026300 |
| H    | -6.98623200 | -1.86025000 | -0.00031000 |
| H    | -5.48429600 | -3.85034400 | -0.00015100 |
| C    | -3.40255600 | 1.13209100  | 0.00000300  |
| C    | -4.20951100 | 2.28669200  | 0.00003400  |
| C    | -3.65986200 | 3.56012500  | 0.00009800  |
| H    | -5.28872600 | 2.19202600  | 0.00002100  |
| C    | -1.45243200 | 2.59685900  | 0.00012200  |
| C    | -2.26945500 | 3.71623900  | 0.00014100  |
| H    | -4.31051600 | 4.42918500  | 0.00012300  |
| H    | -0.37504500 | 2.70677700  | 0.00017200  |
| H    | -1.82872300 | 4.70855000  | 0.00019800  |
| C    | -1.68407200 | -1.23439200 | 0.00008300  |
| C    | -1.99414200 | 1.29803700  | 0.00004700  |
| C    | -1.10820300 | 0.12266500  | 0.00002900  |
| O    | -0.95268800 | -2.24793200 | 0.00018400  |
| N    | 0.19203100  | 0.35220800  | 0.00002100  |
| N    | 1.04385400  | -0.65383500 | 0.00010200  |
| H    | 0.63623500  | -1.60175800 | 0.00016400  |
| C    | 2.41693100  | -0.43697100 | 0.00005100  |
| C    | 3.25804800  | -1.56541000 | 0.00021800  |
| C    | 2.97173200  | 0.85565500  | -0.00016400 |
| C    | 4.63526100  | -1.40749000 | 0.00017600  |
| H    | 2.82417800  | -2.56073800 | 0.00038400  |
| C    | 4.34895800  | 1.01174900  | -0.00020100 |
| H    | 2.31441900  | 1.71516000  | -0.00030300 |
| C    | 5.16976100  | -0.11836200 | -0.00003100 |
| H    | 5.30276600  | -2.25960800 | 0.00030200  |
| H    | 4.80397700  | 1.99413800  | -0.00036500 |
| O    | 7.31965100  | -0.96420600 | 0.00005600  |
| O    | 7.06520800  | 1.20270400  | -0.00027700 |
| N    | 6.62196600  | 0.05231300  | -0.00007300 |

### Hydrazone-3

| Atom | X           | Y           | Z           |
|------|-------------|-------------|-------------|
| C    | 3.29170300  | -2.65817900 | -0.00007300 |
| C    | 2.74871600  | -1.36152600 | -0.00007900 |
| C    | 3.58915300  | -0.22143900 | 0.00003400  |
| C    | 4.97987800  | -0.44623100 | 0.00016900  |
| C    | 5.50671600  | -1.73135000 | 0.00017800  |
| C    | 4.66335200  | -2.84979700 | 0.00005200  |
| H    | 2.60187500  | -3.49469000 | -0.00016700 |
| H    | 5.66745700  | 0.39070100  | 0.00027800  |
| H    | 6.58472200  | -1.86430400 | 0.00028600  |
| H    | 5.07968900  | -3.85217500 | 0.00005500  |
| C    | 3.00511500  | 1.13284100  | 0.00000000  |
| C    | 3.81346700  | 2.28665900  | 0.00000600  |
| C    | 3.26545600  | 3.56064700  | -0.00001900 |
| H    | 4.89259300  | 2.19054200  | 0.00002300  |
| C    | 1.05677300  | 2.59966600  | -0.00006900 |
| C    | 1.87506000  | 3.71803300  | -0.00005500 |
| H    | 3.91701200  | 4.42905100  | -0.00001500 |
| H    | -0.02051100 | 2.71074400  | -0.00011400 |
| H    | 1.43539700  | 4.71087400  | -0.00008000 |
| C    | 1.28285500  | -1.23071200 | -0.00020300 |
| C    | 1.59674900  | 1.29997200  | -0.00003900 |
| C    | 0.71000700  | 0.12553700  | -0.00005300 |
| O    | 0.55034000  | -2.24436400 | -0.00029600 |
| N    | -0.59124100 | 0.35656700  | 0.00003800  |
| N    | -1.44275200 | -0.64739700 | 0.00008400  |
| H    | -1.03519600 | -1.59567900 | 0.00022700  |
| C    | -2.81793700 | -0.42995200 | 0.00006100  |
| C    | -3.37303500 | 0.86074300  | 0.00004700  |
| C    | -3.65979000 | -1.55552700 | 0.00006500  |
| C    | -4.75042500 | 1.01589400  | 0.00002600  |
| H    | -2.71595700 | 1.72066600  | 0.00005900  |
| C    | -5.03701800 | -1.39522700 | 0.00005000  |
| H    | -3.22744500 | -2.55166800 | 0.00007800  |
| C    | -5.59949000 | -0.10663700 | 0.00002800  |
| H    | -5.18286000 | 2.01067000  | 0.00001600  |
| H    | -5.68588100 | -2.26413500 | 0.00005200  |
| C    | -7.02063500 | 0.06207100  | 0.00001100  |
| N    | -8.17652800 | 0.19960100  | -0.00000400 |

## Hydrazone-4

| Atom | X           | Y           | Z           |
|------|-------------|-------------|-------------|
| C    | 3.51449500  | -2.60333500 | 0.00010700  |
| C    | 2.93609500  | -1.32194900 | 0.00002000  |
| C    | 3.74695600  | -0.16036200 | -0.00000900 |
| C    | 5.14426600  | -0.34857200 | 0.00007800  |
| C    | 5.70509400  | -1.61837800 | 0.00015200  |
| C    | 4.89048700  | -2.75868400 | 0.00016100  |
| H    | 2.84596300  | -3.45702500 | 0.00012500  |
| H    | 5.80879000  | 0.50702100  | 0.00007800  |
| H    | 6.78633800  | -1.72320500 | 0.00020400  |
| H    | 5.33316600  | -3.74994400 | 0.00022900  |
| C    | 3.12681300  | 1.17588500  | -0.00005300 |
| C    | 3.90180900  | 2.35330000  | 0.00000600  |
| C    | 3.31828700  | 3.61070200  | -0.00002100 |
| H    | 4.98341200  | 2.28721900  | 0.00007600  |
| C    | 1.13706200  | 2.58586800  | -0.00011400 |
| C    | 1.92296600  | 3.72654200  | -0.00009000 |
| H    | 3.94416300  | 4.49794000  | 0.00001300  |
| H    | 0.05692000  | 2.66546600  | -0.00014900 |
| H    | 1.45461800  | 4.70648800  | -0.00010300 |
| C    | 1.46602900  | -1.22989100 | -0.00000500 |
| C    | 1.71302200  | 1.30035800  | -0.00008900 |
| C    | 0.86358700  | 0.10199400  | -0.00008500 |
| O    | 0.76207800  | -2.26884200 | 0.00006400  |
| N    | -0.45206100 | 0.29783900  | -0.00014000 |
| N    | -1.26654100 | -0.72408600 | -0.00018400 |
| H    | -0.82480400 | -1.65962000 | -0.00031200 |
| C    | -2.65785600 | -0.55816100 | -0.00010500 |
| C    | -3.45822800 | -1.71293800 | -0.00030800 |
| C    | -3.26697300 | 0.70043500  | 0.00015100  |
| C    | -4.83986600 | -1.60640700 | -0.00024700 |
| H    | -2.99029800 | -2.69342200 | -0.00051700 |
| C    | -4.65642500 | 0.80829200  | 0.00020800  |
| H    | -2.64803300 | 1.58908000  | 0.00030700  |
| C    | -5.45335900 | -0.34448500 | 0.00001100  |
| H    | -5.46880300 | -2.48995000 | -0.00039900 |
| H    | -5.10501500 | 1.79432000  | 0.00041200  |
| O    | -6.81760000 | -0.34823100 | 0.00004800  |
| C    | -7.49340900 | 0.89993500  | 0.00029000  |
| H    | -7.25430000 | 1.49015600  | -0.89353000 |
| H    | -8.55857100 | 0.66508500  | 0.00026200  |
| H    | -7.25427400 | 1.48982300  | 0.89432400  |

## Hydrazone-6

| Atom | X           | Y           | Z           |
|------|-------------|-------------|-------------|
| C    | -4.18741300 | -3.37055900 | -0.00092800 |
| C    | -2.89051100 | -2.88393700 | -0.00057100 |
| C    | -2.64288000 | -1.50106900 | -0.00025900 |
| C    | -3.71125200 | -0.57233000 | -0.00031800 |
| C    | -5.02024600 | -1.09475100 | -0.00068200 |
| C    | -5.25480600 | -2.46362300 | -0.00097700 |
| H    | -4.37477200 | -4.43976400 | -0.00116300 |
| H    | -2.03337400 | -3.54810500 | -0.00051100 |
| H    | -5.87352400 | -0.42749000 | -0.00074600 |
| H    | -6.27794200 | -2.82842900 | -0.00125700 |
| C    | -3.43445400 | 0.87686300  | -0.00004700 |
| C    | -4.47359200 | 1.82855400  | -0.00000500 |
| C    | -2.09481800 | 1.34435600  | 0.00012800  |
| C    | -4.21564900 | 3.19118400  | 0.00021600  |
| H    | -5.50603200 | 1.50018400  | -0.00015000 |
| C    | -1.85114000 | 2.73100300  | 0.00034600  |
| C    | -2.89200800 | 3.64538100  | 0.00039300  |
| H    | -5.03996200 | 3.89776000  | 0.00024500  |
| H    | -0.82327300 | 3.07203300  | 0.00047900  |
| H    | -2.67749400 | 4.70994000  | 0.00056400  |
| C    | -0.97373500 | 0.39117400  | 0.00009100  |
| C    | -1.23564200 | -1.05554900 | 0.00013900  |
| O    | -0.30427600 | -1.88409100 | -0.00103600 |
| N    | 0.24497600  | 0.90426100  | 0.00009900  |
| N    | 1.30439500  | 0.12866700  | 0.00024800  |
| H    | 1.18234600  | -0.89418800 | 0.00046000  |
| C    | 2.58498400  | 0.67360500  | 0.00019800  |
| C    | 3.67678400  | -0.25647500 | 0.00036100  |
| C    | 2.83813300  | 2.03569200  | 0.00000600  |
| C    | 5.01424500  | 0.24555500  | 0.00032400  |
| C    | 4.16541300  | 2.51128400  | -0.00002700 |
| H    | 2.00433400  | 2.72627000  | -0.00011400 |
| C    | 5.23889800  | 1.64580100  | 0.00012800  |
| H    | 4.33521800  | 3.58368300  | -0.00017700 |
| H    | 6.25805200  | 2.02079400  | 0.00010200  |
| C    | 4.38591300  | -2.44167600 | 0.00069100  |
| H    | 4.12007100  | -3.49716200 | 0.00083400  |
| C    | 6.05710000  | -0.71616900 | 0.00049100  |
| C    | 5.74839300  | -2.05621700 | 0.00067500  |
| H    | 7.09021300  | -0.37891600 | 0.00047000  |
| H    | 6.52437300  | -2.81463100 | 0.00080500  |
| N    | 3.38429700  | -1.58404700 | 0.00054000  |

## Enol-form

### Hydrazone-1

| Atom | X           | Y           | Z           |
|------|-------------|-------------|-------------|
| C    | -3.97940000 | -2.89840000 | 0.00010000  |
| C    | -2.61630000 | -2.67780000 | 0.00010000  |
| C    | -2.10190000 | -1.36200000 | 0.00000000  |
| C    | -2.97800000 | -0.24120000 | 0.00000000  |
| C    | -4.36570000 | -0.50560000 | 0.00010000  |
| C    | -4.85650000 | -1.80010000 | 0.00020000  |
| H    | -4.37090000 | -3.91090000 | 0.00020000  |
| H    | -1.91570000 | -3.50450000 | 0.00010000  |
| H    | -5.07230000 | 0.31560000  | 0.00010000  |
| H    | -5.93010000 | -1.96460000 | 0.00020000  |
| C    | -2.42720000 | 1.11320000  | 0.00000000  |
| C    | -3.25160000 | 2.26070000  | -0.00010000 |
| C    | -1.01610000 | 1.29540000  | -0.00010000 |
| C    | -2.71790000 | 3.53660000  | -0.00010000 |
| H    | -4.32970000 | 2.14980000  | 0.00000000  |
| C    | -0.49120000 | 2.60620000  | -0.00020000 |
| C    | -1.32490000 | 3.70910000  | -0.00020000 |
| H    | -3.37700000 | 4.39940000  | -0.00020000 |
| H    | 0.58440000  | 2.72970000  | -0.00020000 |
| H    | -0.89920000 | 4.70830000  | -0.00030000 |
| C    | -0.13170000 | 0.13790000  | 0.00000000  |
| C    | -0.67460000 | -1.15700000 | -0.00010000 |
| N    | 1.22550000  | 0.38950000  | 0.00000000  |
| N    | 2.00500000  | -0.62570000 | 0.00000000  |
| C    | 3.39000000  | -0.35850000 | 0.00000000  |
| C    | 4.23530000  | -1.47810000 | -0.00040000 |
| C    | 3.94450000  | 0.93320000  | 0.00050000  |
| C    | 5.61820000  | -1.31250000 | -0.00040000 |
| H    | 3.79170000  | -2.46900000 | -0.00080000 |
| C    | 5.32570000  | 1.08810000  | 0.00050000  |
| H    | 3.28230000  | 1.79030000  | 0.00090000  |
| C    | 6.16840000  | -0.02970000 | 0.00010000  |
| H    | 6.26550000  | -2.18430000 | -0.00080000 |
| H    | 5.75270000  | 2.08690000  | 0.00090000  |
| H    | 7.24620000  | 0.10160000  | 0.00010000  |
| O    | 0.10060000  | -2.23410000 | 0.00000000  |
| H    | 1.05860000  | -1.87940000 | -0.00010000 |

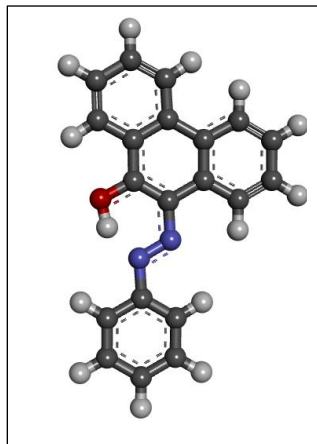

## Hydrazone-2

| Atom | X           | Y           | Z           |
|------|-------------|-------------|-------------|
| C    | -5.00654400 | -2.86018300 | 0.00031900  |
| C    | -3.64051000 | -2.65953100 | 0.00013400  |
| C    | -3.10806800 | -1.35075400 | 0.00004400  |
| C    | -3.96673300 | -0.21614600 | 0.00012600  |
| C    | -5.35721800 | -0.46044200 | 0.00034000  |
| C    | -5.86623800 | -1.74855100 | 0.00043200  |
| H    | -5.41320700 | -3.86644700 | 0.00037600  |
| H    | -2.95222400 | -3.49651700 | 0.00006700  |
| H    | -6.05260700 | 0.36999400  | 0.00046600  |
| H    | -6.94208400 | -1.89700100 | 0.00060600  |
| C    | -3.39726900 | 1.13194500  | -0.00003700 |
| C    | -4.20722800 | 2.28898700  | -0.00009400 |
| C    | -1.98510100 | 1.29723300  | -0.00018500 |
| C    | -3.65697600 | 3.55826700  | -0.00025700 |
| H    | -5.28652000 | 2.19236600  | -0.00003800 |
| C    | -1.44286400 | 2.59952200  | -0.00036400 |
| C    | -2.26262800 | 3.71352200  | -0.00039200 |
| H    | -4.30517000 | 4.42914000  | -0.00029400 |
| H    | -0.36591900 | 2.71070000  | -0.00052200 |
| H    | -1.82428800 | 4.70704400  | -0.00053600 |
| C    | -1.11489500 | 0.12605400  | -0.00015400 |
| C    | -1.67916500 | -1.16679500 | -0.00009500 |
| N    | 0.23702400  | 0.35171800  | -0.00012200 |
| N    | 1.00574600  | -0.67923200 | -0.00017500 |
| C    | 2.38725300  | -0.42353100 | -0.00008100 |
| C    | 3.22687600  | -1.55117200 | -0.00068100 |
| C    | 2.95131400  | 0.86720800  | 0.00064100  |
| C    | 4.60715400  | -1.40301600 | -0.00061700 |
| H    | 2.77889900  | -2.53932500 | -0.00121700 |
| C    | 4.32854600  | 1.02120200  | 0.00071200  |
| H    | 2.29614100  | 1.72884900  | 0.00115900  |
| C    | 5.14200900  | -0.11536900 | 0.00007500  |
| H    | 5.27290300  | -2.25645200 | -0.00108900 |
| H    | 4.79002100  | 2.00063900  | 0.00127200  |
| O    | -0.91813800 | -2.24816700 | -0.00015800 |
| H    | 0.04824300  | -1.90587100 | -0.00018400 |
| O    | 7.29225900  | -0.96772600 | -0.00040700 |
| N    | 6.59916000  | 0.05087800  | 0.00015700  |
| O    | 7.04488100  | 1.19947300  | 0.00078100  |

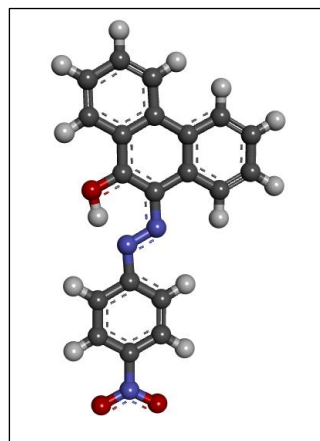

### Hydrazone-3

| Atom | X           | Y           | Z           |
|------|-------------|-------------|-------------|
| C    | -4.60809600 | -2.85881300 | 0.00001600  |
| C    | -3.24212900 | -2.65760900 | 0.00000000  |
| C    | -2.70994500 | -1.34872900 | -0.00000400 |
| C    | -3.56935800 | -0.21475000 | 0.00000700  |
| C    | -4.95993600 | -0.45958000 | 0.00002400  |
| C    | -5.46855500 | -1.74770100 | 0.00002800  |
| H    | -5.01422900 | -3.86533600 | 0.00001900  |
| H    | -2.55355600 | -3.49435200 | -0.00000900 |
| H    | -5.65551300 | 0.37075100  | 0.00003500  |
| H    | -6.54434100 | -1.89669700 | 0.00004200  |
| C    | -3.00022700 | 1.13312400  | 0.00000000  |
| C    | -3.81019000 | 2.29033200  | 0.00000000  |
| C    | -1.58784300 | 1.29821800  | -0.00001000 |
| C    | -3.26013400 | 3.55957100  | -0.00001000 |
| H    | -4.88949500 | 2.19352800  | 0.00000600  |
| C    | -1.04589400 | 2.60090100  | -0.00002300 |
| C    | -1.86563300 | 3.71476400  | -0.00002200 |
| H    | -3.90835000 | 4.43045900  | -0.00001000 |
| H    | 0.03105800  | 2.71195000  | -0.00003600 |
| H    | -1.42734000 | 4.70835500  | -0.00003200 |
| C    | -0.71764700 | 0.12750500  | -0.00001300 |
| C    | -1.28096800 | -1.16401500 | -0.00001500 |
| N    | 0.63596600  | 0.35528900  | -0.00001600 |
| N    | 1.40494500  | -0.67390700 | -0.00006400 |
| C    | 2.78721000  | -0.41750300 | -0.00002900 |
| C    | 3.62808900  | -1.54256500 | -0.00017400 |
| C    | 3.35164100  | 0.87181800  | 0.00015000  |
| C    | 5.00777600  | -1.39200700 | -0.00015100 |
| H    | 3.18133300  | -2.53145100 | -0.00030900 |
| C    | 4.72845100  | 1.02481700  | 0.00017600  |
| H    | 2.69635600  | 1.73363000  | 0.00027000  |
| C    | 5.57081100  | -0.10453300 | 0.00002400  |
| H    | 5.65574600  | -2.26161800 | -0.00026600 |
| H    | 5.16838500  | 2.01647900  | 0.00031500  |
| O    | -0.52008900 | -2.24717200 | -0.00001600 |
| H    | 0.44478200  | -1.90639900 | -0.00000900 |
| C    | 6.99328300  | 0.05993400  | 0.00005200  |
| N    | 8.14932300  | 0.19418900  | 0.00007500  |

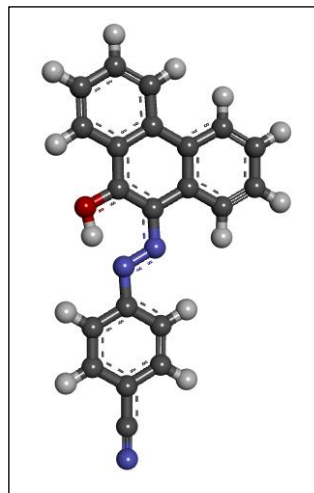



## Hydrazone-4

| Atom | X           | Y           | Z           |
|------|-------------|-------------|-------------|
| C    | -4.84667300 | -2.76007400 | 0.00027400  |
| C    | -3.47518500 | -2.59965800 | 0.00013200  |
| C    | -2.90274600 | -1.30791000 | 0.00008800  |
| C    | -3.72954300 | -0.15019600 | 0.00015000  |
| C    | -5.12766800 | -0.35318800 | 0.00034300  |
| C    | -5.67523300 | -1.62464500 | 0.00040200  |
| H    | -5.28201300 | -3.75458700 | 0.00028000  |
| H    | -2.81175700 | -3.45648700 | 0.00006800  |
| H    | -5.79730200 | 0.49851200  | 0.00049600  |
| H    | -6.75504300 | -1.74196700 | 0.00055300  |
| C    | -3.11919600 | 1.17779300  | -0.00002300 |
| C    | -3.89135900 | 2.36122200  | -0.00008500 |
| C    | -1.70096600 | 1.29640400  | -0.00015400 |
| C    | -3.30163700 | 3.61204700  | -0.00023400 |
| H    | -4.97336400 | 2.29825500  | -0.00006000 |
| C    | -1.11858100 | 2.58318900  | -0.00032800 |
| C    | -1.90207200 | 3.72207200  | -0.00035300 |
| H    | -3.92167800 | 4.50342500  | -0.00026600 |
| H    | -0.03854400 | 2.65817200  | -0.00047400 |
| H    | -1.43228200 | 4.70143500  | -0.00048800 |
| C    | -0.86846200 | 0.10166900  | -0.00009800 |
| C    | -1.46784100 | -1.16574400 | -0.00001500 |
| N    | 0.50100800  | 0.29691300  | -0.00011400 |
| N    | 1.23591400  | -0.75082500 | -0.00025300 |
| C    | 2.62756600  | -0.54921500 | -0.00018200 |
| C    | 3.43007100  | -1.70403000 | -0.00077100 |
| C    | 3.24807300  | 0.70922500  | 0.00050000  |
| C    | 4.81171800  | -1.60680300 | -0.00074800 |
| H    | 2.94812100  | -2.67685000 | -0.00130500 |
| C    | 4.63444900  | 0.81495900  | 0.00054800  |
| H    | 2.63003700  | 1.59900100  | 0.00103300  |
| C    | 5.42678700  | -0.34495400 | -0.00008600 |
| H    | 5.44046800  | -2.49051900 | -0.00123200 |
| H    | 5.09023300  | 1.79785400  | 0.00108700  |
| O    | -0.74201600 | -2.27965500 | -0.00003000 |
| H    | 0.22825400  | -1.97032100 | -0.00016700 |
| O    | 6.78775600  | -0.35105300 | -0.00001300 |
| C    | 7.47220200  | 0.89403900  | 0.00073800  |
| H    | 7.23635800  | 1.48389000  | 0.89516300  |
| H    | 8.53542200  | 0.65115900  | 0.00070500  |
| H    | 7.23648900  | 1.48486800  | -0.89306800 |

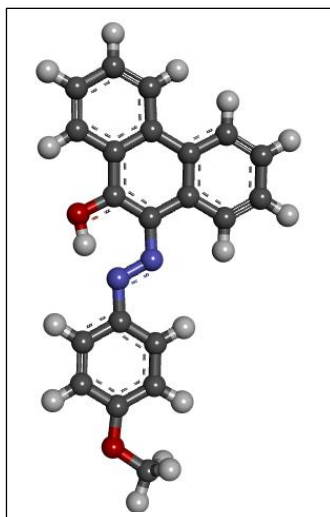

## Hydrazone-6

| Atom | X           | Y           | Z           |
|------|-------------|-------------|-------------|
| C    | 4.18440800  | -3.36699100 | 0.00092300  |
| C    | 2.88742800  | -2.88057800 | 0.00056600  |
| C    | 2.63957300  | -1.49775000 | 0.00025400  |
| C    | 3.70779500  | -0.56883900 | 0.00031300  |
| C    | 5.01687300  | -1.09104800 | 0.00067700  |
| C    | 5.25165500  | -2.45988200 | 0.00097200  |
| H    | 4.37194000  | -4.43616500 | 0.00115800  |
| H    | 2.03039800  | -3.54488500 | 0.00050600  |
| H    | 5.87004300  | -0.42364900 | 0.00074100  |
| H    | 6.27484900  | -2.82452300 | 0.00125200  |
| C    | 3.43076300  | 0.88031000  | 0.00004200  |
| C    | 4.46974700  | 1.83216900  | 0.00000000  |
| C    | 2.09105100  | 1.34758600  | -0.00013300 |
| C    | 4.21158300  | 3.19475700  | -0.00022100 |
| H    | 5.50224000  | 1.50396600  | 0.00014500  |
| C    | 1.84714900  | 2.73419400  | -0.00035100 |
| C    | 2.88786900  | 3.64874000  | -0.00039800 |
| H    | 5.03578200  | 3.90146600  | -0.00025000 |
| H    | 0.81922700  | 3.07505800  | -0.00048400 |
| H    | 2.67318300  | 4.71326400  | -0.00056900 |
| C    | 0.97012200  | 0.39422300  | -0.00009600 |
| C    | 1.23226300  | -1.05245800 | -0.00014400 |
| O    | 0.30103100  | -1.88115000 | 0.00103100  |
| N    | -0.24867200 | 0.90711300  | -0.00010400 |
| N    | -1.30796500 | 0.13134800  | -0.00025300 |
| C    | -2.58864200 | 0.67607900  | -0.00020300 |
| C    | -3.68029200 | -0.25417800 | -0.00036600 |
| C    | -2.84201200 | 2.03812500  | -0.00001100 |
| C    | -5.01783400 | 0.24763600  | -0.00032900 |
| C    | -4.16936900 | 2.51350200  | 0.00002200  |
| H    | -2.00832400 | 2.72883700  | 0.00010900  |
| C    | -5.24271400 | 1.64784600  | -0.00013300 |
| H    | -4.33934700 | 3.58587400  | 0.00017200  |
| H    | -6.26192800 | 2.02267400  | -0.00010700 |
| C    | -4.38906800 | -2.43949300 | -0.00069600 |
| H    | -4.12305500 | -3.49493600 | -0.00083900 |
| C    | -6.06053400 | -0.71425700 | -0.00049600 |
| C    | -5.75161000 | -2.05425500 | -0.00068000 |
| H    | -7.09370100 | -0.37717100 | -0.00047500 |
| H    | -6.52746800 | -2.81279400 | -0.00081000 |
| N    | -3.38759100 | -1.58170300 | -0.00054500 |
| H    | -0.53971300 | -1.41773900 | 0.00037400  |

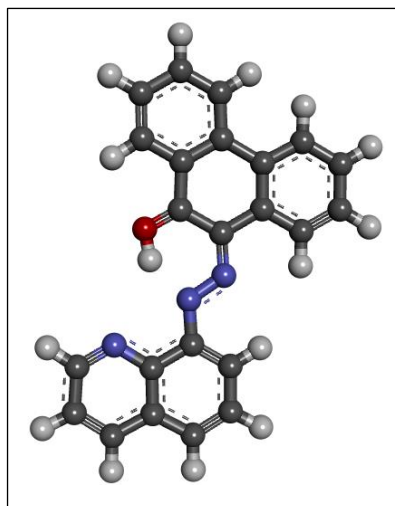

Supplement: d3nj02198j1.pdf [file d3nj02198j1.pdf]
